1 **Chikungunya virus outbreak in the Amazon region: replacement of**  
2 **the Asian genotype by an ECSA lineage?**

3

4 Naveca, F. G. <sup>1</sup>, Claro, I. <sup>2</sup>, Giovanetti, M. <sup>3,4</sup>, Jesus, J. G. <sup>3,5</sup>, Xavier, J. <sup>3,5</sup>, Iani, F. C.  
5 M. <sup>4,6</sup>, do Nascimento V. A. <sup>1</sup>, de Souza, V. C. <sup>1</sup>, Silveira, P. P. <sup>7</sup>, Lourenço, J. <sup>8</sup>,  
6 Santillana, M. <sup>9,10</sup>, Kraemer, M. U. G. <sup>8,11</sup>, Quick, J. <sup>12</sup>, Hill, S. C. <sup>8</sup>, Thézé, J. <sup>8</sup>,  
7 Carvalho, R. D. O. <sup>4</sup>, Azevedo, V. <sup>4</sup>, Salles, F. C. S. <sup>2</sup>, Nunes, M. R. T. <sup>13</sup>, Lemos, P. S.  
8 <sup>13</sup>, Candido, D. S. <sup>8</sup>, Pereira, G. C. <sup>4</sup>, Oliveira, M. A. A. <sup>4</sup>, Meneses, C. A. R. <sup>14</sup>, Maito,  
9 R. M. <sup>14</sup>, Cunha, C. R. S. B. <sup>14</sup>, Campos, D. P. S. <sup>15</sup>, Castilho, M. C. <sup>16</sup>, Siqueira, T. C.  
10 S. <sup>15</sup>, Terra, T. M. <sup>17</sup>, de Albuquerque, C. F. C. <sup>18</sup>, da Cruz, L. N. <sup>19</sup>, Abreu, A. L. <sup>19</sup>,  
11 Martins, D. V. <sup>19</sup>, Simoes, D. S. M. V. <sup>19</sup>, Aguiar, R. S. <sup>7</sup>, Luz S. L. B. <sup>1</sup>, Loman, N. <sup>12</sup>,  
12 Pybus, O. G. <sup>8</sup>, Sabino, E. C. <sup>2</sup>, Okumoto, O. <sup>19</sup>, Alcantara, L. C. J. <sup>3,4\*</sup>, Faria, N. R. <sup>8\*</sup>

13

14 1. Laboratório de Ecologia de Doenças Transmissíveis na Amazônia, Instituto  
15 Leônidas e Maria Deane, FIOCRUZ, Manaus, Brazil.

16 2. Instituto de Medicina Tropical e Faculdade de Medicina da Universidade de São  
17 Paulo, São Paulo, Brazil.

18 3. Laboratório de Flavivírus, Instituto Oswaldo Cruz, FIOCRUZ, Rio de Janeiro,  
19 Brazil.

20 4. Laboratório de Genética Celular e Molecular, Instituto de Ciências Biológicas,  
21 Universidade Federal de Minas Gerais, Belo Horizonte, Minas Gerais, Brazil.

22 5. Laboratório de Patologia Experimental, Instituto Gonçalo Moniz, Fundação  
23 Oswaldo Cruz, Salvador, Bahia, Brazil.

24 6. Laboratório Central de Saúde Pública, Instituto Octávio Magalhães, FUNED, Belo  
25 Horizonte, Minas Gerais, Brazil.

26 7. Laboratório de Virologia Molecular, Departamento de Genética, Instituto de  
27 Biologia, Universidade Federal do Rio de Janeiro, Rio de Janeiro, Brazil.

28 8. Department of Zoology, University of Oxford, South Parks Road, Oxford, United  
29 Kingdom.

30 9. Harvard Medical School, Department of Pediatrics, Boston, MA, USA.

31 10. Computational Health Informatics Program, Boston Children's Hospital, Boston,  
32 MA, USA.

- 33 11. Computational Epidemiology Lab, Boston Children’s Hospital, Boston, MA,  
34 USA.
- 35 12. Institute of Microbiology and Infection, University of Birmingham, Birmingham  
36 B15 2TT, United Kingdom.
- 37 13. Evandro Chagas Institute, Brazilian Ministry of Health, Ananindeua, Brazil.
- 38 14. Laboratório Central de Saúde Pública, Boa Vista, Roraima, Brazil.
- 39 15. Superintendência de Vigilância em Saúde, Secretaria Municipal de Saúde de Boa  
40 Vista, Roraima, Brazil.
- 41 16. Departamento de Virologia, Fundação de Medicina Tropical Doutor Heitor Vieira  
42 Dourado, Manaus, Amazonas, Brazil.
- 43 17. Laboratório Central de Saúde Pública do Amazonas, Manaus, Amazonas, Brazil.
- 44 18. Organização Pan - Americana da Saúde/Organização Mundial da Saúde -  
45 (OPAS/OMS), Brasília-DF, Brazil.
- 46 19. Secretaria de Vigilância em Saúde, Ministério da Saúde (SVS/MS), Brasília-DF,  
47 Brazil.
- 48
- 49
- 50
- 51
- 52 **Corresponding authors:** [luiz.alcantara@ioc.fiocruz.br](mailto:luiz.alcantara@ioc.fiocruz.br) and [nuno.faria@zoo.ox.ac.uk](mailto:nuno.faria@zoo.ox.ac.uk)

53 **Abstract**

54 *Background*

55 Since its first detection in the Caribbean in late 2013, chikungunya virus (CHIKV) has  
56 affected 51 countries in the Americas. The CHIKV epidemic in the Americas was  
57 caused by the CHIKV-Asian genotype. In August 2014, local transmission of the  
58 CHIKV-Asian genotype was detected in the Brazilian Amazon region. However, a  
59 distinct lineage, the CHIKV-East-Central-South-America (ECSA)-genotype, was  
60 detected nearly simultaneously in Feira de Santana, Bahia state, northeast Brazil. The  
61 genomic diversity and the dynamics of CHIKV in the Brazilian Amazon region  
62 remains poorly understood despite its importance to better understand the  
63 epidemiological spread and public health impact of CHIKV in the country.

64

65 *Methodology/Principal Findings*

66 We report a large CHIKV outbreak (5,928 notified cases between August 2014 and  
67 August 2018) in Boa Vista municipality, capital city of Roraima's state, located in the  
68 Brazilian Amazon region. In just 48 hours, we generated 20 novel CHIKV-ECSA  
69 genomes from the Brazilian Amazon region using MinION portable genome  
70 sequencing. Phylogenetic analyses revealed that despite an early introduction of the  
71 Asian genotype in 2015 in Roraima, the large CHIKV outbreak in 2017 in Boa Vista  
72 was caused by an ECSA-lineage most likely introduced from northeastern Brazil.  
73 Epidemiological analyses suggest a basic reproductive number of  $R_0$  of 1.66, which  
74 translates in an estimated 39 (95% CI: 36 to 45) % of Roraima's population infected  
75 with CHIKV-ECSA. Finally, we find a strong association between Google search  
76 activity and the local laboratory-confirmed CHIKV cases in Roraima.

77

78 *Conclusions/Significance*

79 This study highlights the potential of combining traditional surveillance with portable  
80 genome sequencing technologies and digital epidemiology to inform public health  
81 surveillance in the Amazon region. Our data reveal a large CHIKV-ECSA outbreak in  
82 Boa Vista, limited potential for future CHIKV outbreaks, and indicate a replacement  
83 of the Asian genotype by the ECSA genotype in the Amazon region.

84

85

86 **Author Summary**

87 Until the end of 2017, Brazil notified the highest number of infections caused by  
88 chikungunya virus (CHIKV) in the Americas. We investigated a large CHIKV  
89 outbreak in Boa vista municipality in the Brazilian Amazon region. Rapid portable  
90 genome sequencing of 20 novel isolates and subsequent genetic analysis revealed that  
91 ECSA lineage was introduced from northeastern Brazil to Roraima around July 2016.  
92 Epidemiological analyses suggest a basic reproductive number of  $R_0$  of 1.66, which  
93 suggests that approximately 39% of Roraima's population was infected with CHIKV-  
94 ECSA. Given the dominance of the CHIKV-Asian genotype in the Americas, our data  
95 highlights the rapid spread of a less understood and poorly characterized CHIKV-  
96 ECSA genotype in Brazil. Investigations on potential associations between public  
97 health impact of CHIKV and genetic diversity of circulating strains are warranted to  
98 better evaluate its impact in Brazil and beyond.

99

100 **Keywords**

101 Chikungunya, East-Central-South-African, surveillance, Amazon region, MinION  
102 genome sequencing, traditional epidemiology, genomic epidemiology, digital  
103 epidemiology, phylodynamics.

## 104 **Introduction**

105 In August 2014, local transmission of chikungunya virus (CHIKV) was detected in  
106 Brazil for the first time, with cases being reported nearly simultaneously in Oiapoque  
107 (Amapá state, north Brazil) and Feira de Santana (Bahia state, northeast Brazil), two  
108 municipalities separated by >2000 km distance. Genetic analysis confirmed the co-  
109 circulation of distinct virus lineages in Brazil: the Asian genotype (CHIKV-Asian)  
110 was introduced to Oiapoque possibly from neighbouring French Guiana, while the  
111 East-Central-South-African genotype (CHIKV-ECSA) was introduced to Feira de  
112 Santana from a traveller returning from Angola [1].

113 Since 2014 and until the end of September 2018, a total of 697,564 CHIKV  
114 cases have been notified in Brazil (including 94,672 laboratory-confirmed cases). This  
115 is the largest number recorded in any of the 51 countries or territories reporting local  
116 CHIKV transmission in the Americas [2]. The virus has been circulating in the  
117 Americas since 2013 where approximately 260 million people live in areas at-risk of  
118 transmission [2-4]. Similar to the recent Zika virus epidemic [5], the rapid spread of  
119 CHIKV in the Americas, including in Brazil, results from several factors, including  
120 the establishment and abundance of competent *Aedes* spp. vectors, lack of population  
121 immunity, and increased mobility of vectors and humans between regions reporting  
122 current presence of the virus [6].

123 Chikungunya virus is an enveloped, non-segmented, single-stranded positive  
124 polarity RNA alphavirus that is a member of the *Togaviridae* family and is  
125 transmitted predominately by the *Aedes aegypti* and *Aedes albopictus* vectors, which  
126 are widespread in Brazil [7]. There are four main genotypes: (i) the West African  
127 genotype is maintained in an enzootic cycle in Africa, (ii) the Asian genotype, which  
128 is endemic in Asia, (iii) the East-Central-South-African genotype, endemic to Africa,  
129 and (iv) the Indian Ocean Lineage (IOL) genotype, an epidemic lineage that emerged  
130 from the ECSA genotype around 2004 and swept through the Indian Ocean region  
131 causing a series of explosive outbreaks [8].

132 The first symptoms of CHIKV infection are a rapid increase in temperature  
133 (>38.9°C), followed by severe, often debilitating polyarthralgia. Serological data  
134 from La Reunion, Philippines and the Indian Ocean island of Mayotte suggest that  
135 75-97% of persons infected with CHIKV develop symptomatic infections [9].  
136 Seroprevalence data from Brazil suggests that 45.7 to 57.1% Riachão do JacuÍpe

137 and of Feira de Santana, both located in Bahia state, were exposed to CHIKV in  
138 2015, with a total of 32.7% to 41.2% of the population reporting symptoms [10].

139 Throughout Asia and the Americas, chikungunya virus outbreaks have been  
140 associated with unique clinical features [11], including long-lasting symptoms [12],  
141 and high mortality resulting from complications associated with CHIKV infection  
142 [13, 14]. In Brazil, a striking proportion of 68.1 to 75% of the population with  
143 positive serological results reporting symptoms contracted a chronic form of the  
144 disease [12, 15]. However, the epidemiological features, genomic diversity, and  
145 transmission dynamics of recent CHIKV outbreaks in this country remain poorly  
146 understood. Inferences that are based only on clinical-epidemiological notifications  
147 are complicated by underreporting of cases by the national reporting system [16],  
148 mostly due to the co-circulation and co-infection with viruses that cause overlapping  
149 symptoms, such as Zika and dengue viruses [17-19]. Moreover, CHIKV serological  
150 tests may cross-react with other alphaviruses, such as Mayaro virus, that circulate in  
151 the north and centre-west regions of Brazil [20, 21]. In this context, it is challenging  
152 to use only clinical-epidemiological and serological data to evaluate the true extent of  
153 the disease. Moreover, accurate incidence data is critical to forecast and provide  
154 prediction of the course of epidemics [22].

155 Until the end of 2016, 83.3% of the cases in Brazil were reported in northeast  
156 region of the country [23]. However, in 2017, Roraima state, located in the Amazon  
157 basin in the north of Brazil, reported its first large CHIKV outbreak. Roraima is the  
158 northernmost state of Brazil, lies in the Amazon basin, borders Venezuela and French  
159 Guiana to the north, and Amazonas and Pará states to the south, and its equatorial  
160 climate favours year round transmission of mosquito-borne viruses [24]. Within  
161 Brazil's northern states, Roraima has been implicated as a stepping-stone to virus  
162 introductions from other Latin American regions, such as dengue [25], and yellow  
163 fever virus in the past [26]. Moreover, the Amazon region has recently been  
164 highlighted as a region with high transmission potential of vector-borne diseases [4]  
165 and, more generally, a region with high potential for virus zoonoses and emergence  
166 [27].

167 Due to its connectivity and potential impact on global epidemiology of vector-  
168 borne and zoonotic virus from the Amazon basin, it is important to improve genomic  
169 pathogen surveillance in Roraima. By August 2018, the public health laboratory of  
170 Boa Vista (capital city of Roraima state) had reported 5,928 CHIKV cases, 3,795 of

171 which were laboratory-confirmed. Here we use a combination of on-site portable  
172 virus genome sequencing, and epidemiological analysis of case count and web search  
173 data to describe the circulation, genetic diversity, epidemic potential and attack rates  
174 of a large CHIKV outbreak in Boa Vista.  
175

## 176 **Methods**

### 177 **Connectivity in study area**

178 Roraima is the northernmost of Brazil's 27 federal units (**Figure 1a**) and has an  
179 estimated population of 450,479, of whom 284,313 live in the capital city of Boa  
180 Vista ([ibge.gov.br/](http://ibge.gov.br/)). Despite being Brazil's least populated federal unit, Roraima is  
181 one of the best-connected Brazilian states in the Amazon basin [28]. Within Brazil,  
182 Roraima is connected to Amazonas state in the south via the road BR-174. This  
183 road also connects Roraima's capital city, Boa Vista, to the states of Bolivar and  
184 Amazonas in Venezuela in the north. Further, the road BR-401 links Boa Vista to  
185 Guyana in the east. There are four daily flights connecting Boa Vista with Brasília,  
186 capital of Brazil, as well as six weekly flights to Manaus, the capital city of  
187 Amazonas state and the biggest city in the north of the country, with connecting  
188 daily nonstop flights to all other Brazilian states/regions and international  
189 destinations, including important international airport hubs in Panamá City and  
190 Miami, USA. There are also less-commonly used seasonal fluvial networks that  
191 connect Boa Vista and Manaus via the Amazonas river.

192

193 **[Figure 1 around here]**

194

### 195 **Chikungunya virus case count time series**

196 The Roraima State Central Laboratory (LACEN-RR) is responsible for the differential  
197 diagnosis of suspected arbovirus cases presenting to Roraima's public health units.  
198 Between Jan 2014 and September 2018, LACEN-RR notified 5,928 CHIKV cases in  
199 Boa Vista alone, 3,795 of these laboratory-confirmed, to the National Reportable  
200 Disease Information System (SINAN). Case count time series are available from  
201 Github (<http://github.com/arbospread>). We follow the Brazilian Ministry of Health's  
202 guidelines and define a notified CHIKV case as a suspected case characterized by (i)  
203 acute onset of fever  $>38.5^{\circ}\text{C}$ , (ii) severe arthralgia and/or arthritis not explained by  
204 other medical conditions, and (iii) residing or having visited epidemic areas within 15  
205 days before onset of symptoms. A laboratory-confirmed case is a suspected case  
206 confirmed by laboratory methods such as (i) virus isolation in cell culture, (ii)  
207 detection of viral RNA, (iii) detection of virus-specific IgM antibodies in a single  
208 serum sample collected in the acute or convalescent stage of infection; or (iv) a four-



209 fold rise of IgG titres in samples collected during the acute phase, in comparison with  
210 a sample collected in the convalescent period.

211

### 212 **Nucleic acid isolation and RT-qPCR**

213 Residual anonymized clinical diagnostic samples were sent to Instituto Leônidas e  
214 Maria Deane, FIOCRUZ Manaus, Amazonas, Brazil, for molecular diagnostics as  
215 part of the ZiBRA-2 project. The ZiBRA-2 project was approved by the Pan  
216 American Health Organization Ethics Review Committee (PAHOERC) n° PAHO-  
217 2016-08-0029. Total RNA extraction was performed with QIAmp Viral RNA Mini kit  
218 (Qiagen), following manufacturer's recommendations. Samples were first tested  
219 using a multiplexed qRT-PCR protocol against CHIKV, dengue virus (DENV1-4),  
220 yellow fever virus, Zika virus, Oropouche virus and Mayaro virus [29]. All qRT-PCR  
221 results were corroborated using a second protocol [30]; comparable Ct values were  
222 obtained with the two protocols. CHIKV positive samples tested negative for all other  
223 arboviruses tested. Samples were selected for sequencing based on Ct-value <30 (to  
224 maximize genome coverage of clinical samples by nanopore sequencing [31]), and  
225 based on the availability of epidemiological metadata, such as date of onset of  
226 symptoms, date of sample collection, gender, municipality of residence, and  
227 symptoms (**Table 1**). We included 13 samples from Roraima state plus 5 additional  
228 samples from patients visiting the LACEN-Amazonas in Manaus, under the auspices  
229 of the ZiBRA project (<http://www.zibraproject.org/>). All samples were processed in  
230 accordance with the terms of Resolution 510/2016 of CONEP (National Ethical  
231 Committee for Research, Brazilian Ministry of Health).

232

### 233 **Complete genome MinION nanopore sequencing**

234 Between the 1<sup>st</sup> and 7<sup>th</sup> June 2017, we attempted sequencing at Instituto Leônidas e  
235 Maria Deane, FIOCRUZ Manaus on all selected samples with Ct-value <30. We used  
236 an Oxford Nanopore MinION device with protocol chemistry R9.4, as previously  
237 described [32]. Sequencing statistics can be found in **Table S1 (Julien)**. In brief, we  
238 employed a protocol with cDNA synthesis using random primers followed by strain-  
239 specific multiplex PCR [32]. Extracted RNA was converted to cDNA using the  
240 Protoscript II First Strand cDNA synthesis Kit (New England Biolabs, Hitchin,  
241 UK) and random hexamer priming. CHIKV genome amplification by multiplex  
242 PCR was attempted using the CHIKAsianECSA primer scheme and 35 cycles of

243 PCR using Q5 High-Fidelity DNA polymerase (NEB) as described in [32]. PCR  
244 products were cleaned up using AmpureXP purification beads (Beckman Coulter,  
245 High Wycombe, UK) and quantified using fluorimetry with the Qubit dsDNA High  
246 Sensitivity assay on the Qubit 3.0 instrument (Life Technologies). PCR products  
247 for samples yielding sufficient material were barcoded and pooled in an equimolar  
248 fashion using the Native Barcoding Kit (Oxford Nanopore Technologies, Oxford,  
249 UK). Sequencing libraries were generated from the barcoded products using the  
250 Genomic DNA Sequencing Kit SQK-MAP007/SQK-LSK108 (Oxford Nanopore  
251 Technologies). Libraries were loaded onto a R9/R9.4 flow cell and sequencing data  
252 were collected for up to 48 hr. Consensus genome sequences were produced by  
253 alignment of two-direction reads to a CHIKV virus reference genome (GenBank  
254 Accession number: N11602) as previously described in [32]. Positions with  $\geq 20\times$   
255 genome coverage were used to produce consensus alleles, while regions with lower  
256 coverage, and those in primer-binding regions were masked with N characters.  
257 Validation of the sequencing protocol was previously performed in [32].

258

### 259 **Collation of CHIKV-ECSA complete genome datasets**

260 Genotyping was first conducted using the phylogenetic arbovirus subtyping tool  
261 available at <http://www.krisp.org.za/tools.php>. Complete and near complete  
262 sequences were retrieved from GenBank on June 2017 [33]. Two complete or near-  
263 complete CHIKV genome datasets were generated. Dataset 1 included ECSA-  
264 PreAm (ECSA sampled outside the Americas) and ECSA-Br (ECSA sequences  
265 sampled in the Americas) sequences. This dataset contained 36 complete genomes  
266 from the ECSA genotype, including 7 from East and Central Africa (HM045823  
267 from Angola 1962; HM045784 from Central African Republic 1984; HM045812  
268 from Uganda 1982; KY038947 from Central African Republic 1983; HM045793  
269 from Central African Republic 1986; HM045822 from Central African Republic  
270 1978; and KY038946 from Central African Republic 1975). Dataset 1 also included  
271 29 sequences from Brazil, including the new 18 genomes reported here from the  
272 ECSA lineage and 3 genomes from the outbreak caused by the ECSA lineage in  
273 June 2016 in Maceió, Alagoas states, northeast Brazil (**Figure 1a**) [34]. Dataset 2  
274 (ECSA-Br) included only the 29 Brazilian genome sequences. Using a robust  
275 nonparametric test [35], no evidence of recombination was found in both datasets.  
276

277

278

### 279 **Maximum likelihood analysis and temporal signal estimation**

280 Maximum likelihood (ML) phylogenetic analyses were performed for each dataset  
281 using RAxML v8 [36]. We used a GTR nucleotide substitution model with 4  
282 gamma categories (GTR+4 $\Gamma$ ). In order to investigate the evolutionary temporal  
283 signal in each dataset, we regressed root-to-tip genetic distances against sample  
284 collection dates using TempEst [37]. For both datasets we obtained a strong linear  
285 correlation (dataset 1:  $r^2=0.93$ ; dataset 2:  $r^2=0.84$ ) suggesting these alignments  
286 contain sufficient temporal information to justify a molecular clock approach.  
287 However, for dataset 1, the Angola/M2022/1962 strain was positioned substantially  
288 above the regression line. Previous investigations have suggested this strain may  
289 have been the result of contamination or high passage in cell culture [8], so this  
290 sequence was removed from subsequent analyses.

291

### 292 **Molecular clock phylogenetic analysis**

293 To estimate time-calibrated phylogenies we used the BEAST v.1.10.1 software  
294 package [38]. To infer historical trends in effective population size from the  
295 genealogy we used several different coalescent models. Because preliminary  
296 analysis indicated oscillations in epidemic size through time (as also expected from  
297 national case report data), we used three flexible, non-parametric models: a) the  
298 standard Bayesian skyline plot (BSP; 10 groups) [39], b) the Bayesian skyride plot  
299 [40], and c) the Bayesian skygrid model [41], with 45 grid points equally spaced  
300 between the estimated TMRCA of the CHIKV-ECSA genotype in Brazil and the  
301 date of the earliest available isolate, collected in 18 March 2017 [41]. For  
302 comparison, we also used a constant population size coalescent model. We tested  
303 two molecular clock models: a) the strict molecular clock model, which assumes a  
304 single rate across all phylogeny branches, and b) the more flexible uncorrelated  
305 relaxed molecular clock model with a lognormal rate distribution (UCLN) [42].  
306 Because the marginal posterior distribution of the coefficient of variation of the  
307 UCLN model did not exclude zero (most likely due to the small alignment size), we  
308 used a strict molecular model in all analyses. For each coalescent model, Markov

309 Chain Monte Carlo analyses were run in duplicate for 10 million steps using a ML  
310 starting tree, and the GTR+4 $\Gamma$  codon partition (CP)1+2,3 model [42].

311

### 312 **Epidemiological analysis**

313 The epidemic basic reproductive number ( $R_0$ ) was estimated from monthly  
314 confirmed cases, as previously described [31, 43]. Because (i) the Asian genotype  
315 was circulating in the north region of Brazil since 2014 [1], and (ii) we observed a  
316 relatively small number of cases both in the notified and confirmed time series, we  
317 assume cases from June 2014 and December 2016 did not represent autochthonous  
318 transmission of CHIVK-ECSA. We assume a mean generation time of 14 days, as  
319 previously reported elsewhere [44]. We report  $R_0$  estimates for different values of  
320 the generation time (g) parameter, along with corresponding estimates of the  
321 epidemic exponential growth rate, per month (r).

322

### 323 **Web search query data**

324 Available in near-real time, disease-related Internet search activity has been shown  
325 to track disease activity (a) in seasonal mosquito-borne disease outbreaks, such as  
326 those caused by dengue [42, 82], and (b) in unexpected and emerging mosquito-  
327 borne disease outbreaks such as the 2015-2016 Latin American Zika outbreak [45].  
328 Here, we investigated whether we could find a meaningful relationship between  
329 Internet search activity and the local chikungunya outbreak in Roraima. Indeed,  
330 novel Internet-based data sources have the potential to complement traditional  
331 surveillance by capturing early increases in disease-related search activity that may  
332 signal an increase in the public's perception of a given public health threat and may  
333 additionally capture underlying increases in disease activity. Internet searches may  
334 be particularly important and indicative of changes in disease transmission early  
335 during an outbreak, when ongoing information on the virus transmission is  
336 obfuscated by a lack of medical surveillance. In addition, Internet search trends  
337 may also help track disease activity in populations that may not seek formal  
338 medical care. We used the Google Trends (GT) tool [45] to compile the monthly  
339 fraction of online searches for the term "Chikungunya", that originated from Boa  
340 Vista municipality (Roraima state), between January 2014 and July 2018. For  
341 comparison, GT search activity for the term "Chikungunya" was collected for the

342 same time period for Manaus municipality (Amazonas state). The synchronicity of  
343 GT time series and notified and confirmed case counts from Boa Vista and Manaus  
344 was assessed using the Spearman's rank correlation test in the R software [46].

345

346 **Data availability**

347 XML files and datasets analysed in this study are available in the GitHub  
348 repository (<http://github.com/arbospread>). New sequences have been deposited in  
349 GenBank under accession numbers MK121891-MK121908 (CHIKV-ECSA) and  
350 MK134712-MK134713 (CHIKV-Asian).

351 **Results**

352 Although most CHIKV notified cases in Brazil were reported in 2016  
353 (**Figure 1**), in Roraima, the majority of notified and confirmed cases in Roraima  
354 state were reported in 2017 (5,027 notified cases and 3,720 laboratory-confirmed  
355 infections). The number of cases in Roraima started increasing exponentially in  
356 January 2017, and the outbreak peaked in July 2017.

357

358 **Figure 1 around here**

359

360 We attempted on-site portable nanopore sequencing of isolates collected  
361 during the early phase of the outbreak (February to March 2017). We selected 15  
362 RT-qPCR+ virus isolates from autochthonous cases in Roraima state (11 from Boa  
363 Vista, 1 from Bonfim, and 1 from Iracema municipalities) (**Table 1**) with a cycle  
364 threshold (Ct)  $\leq 30$  (mean 20.3, range 13.7 – 27.41). We included two isolates from  
365 two infected travellers returning to Roraima in December 2014, and an additional five  
366 isolates from Amazonas state (all from Manaus municipality), sampled between July  
367 2015 and March 2017. In less than 48 hours genome sequence data was obtained for  
368 all selected isolates and in less than 72 hours preliminary results were shared with  
369 local public health officials and the Brazilian Ministry of Health. A mean genome  
370 coverage of 86% (20x) per base pair was obtained for the sequenced data; mean  
371 coverage increased to 90% when focusing on samples with Ct < 26 (**Figure 2a**).  
372 Coverage of individual sequences and epidemiological information for each  
373 sequenced isolate can be found in **Table 1**.

374

375 **Table 1 around here**

376

377 Manual and automated phylogenetic analysis identified the ECSA genotype as  
378 the dominant genotype circulating in both Roraima and Manaus between 2015 and  
379 2017. However, two cases from late 2014 returning from Venezuela to Roraima  
380 (AMA294 and AMA295) were classified as Asian genotype, the dominant lineage  
381 circulating in Latin America. Regression analysis of genetic divergence and sampling  
382 dates shows accumulation of temporal signal in the ECSA-Br dataset ( $r^2 = 0.84$ )  
383 (**Figure 2b**).

384 We estimated the evolutionary time-scale of the ECSA-Br lineage using  
385 several well-established molecular clock coalescent methods. Our substitution rate  
386 estimates indicate that the ECSA-Br lineage is evolving at  $7.15 \times 10^{-4}$  substitutions  
387 per site per year (s/s/y; 95% Bayesian credible interval:  $5.04 - 9.55 \times 10^{-4}$ ). This  
388 estimated rate is higher than that estimated for endemic lineages, and is similar to the  
389 evolutionary rates estimated for the epidemic lineage circulating in the Indian Ocean  
390 region (**Figure 2c**). A closer inspection of amino acid mutations indicate that the  
391 ECSA-Br strains lack both the A226V (E1 protein) and the L210Q (E2 protein)  
392 mutations that has been reported to increase virus transmissibility and persistence  
393 in *Ae. albopictus* populations in the Indian Ocean [47].

394 ML and Bayesian phylogenetic analyses reveal that the ECSA sequences from  
395 Brazil (hereafter named ECSA-Br lineage) form a single well-supported clade  
396 (bootstrap support = 100) (**Figure 3**). This is consistent with the establishment of the  
397 ECSA genotype in Brazil following the introduction of a single strain to the Americas  
398 [1]. The two isolates collected in late 2014 in Roraima cluster together and fall as  
399 expected within the diversity of other Asian genotype sequences from the Americas.  
400 Our phylogenetic reconstruction suggests at least five separate introductions of the  
401 Asian genotype strain Brazil (**Figure S1**), in contrast to a single introduction of the  
402 ECSA genotype followed by onward transmission. Moreover, all 13 ECSA isolates  
403 sampled in Roraima (*node C*) cluster together with maximum phylogenetic support  
404 (bootstrap support = 100; posterior probability = 1.00) (**Figure 3**). We consistently  
405 estimate the date of the most recent common ancestor of ECSA-Br Roraima clade to  
406 be mid-July 2016 (95% BCI: late March to late October 2016) (**Figure 3**); similar  
407 dating estimates under different coalescent models (**Figure S2**). In contrast to the  
408 Roraima strains, sequences from Manaus were found to be interspersed with isolates  
409 from Bahia and Pernambuco (**Figure 3**), indicating separate introductions of the  
410 CHIKV-ECSA lineage, some in early 2015 (*node B*), possibly from the northeast  
411 region of Brazil. Interestingly, according to travel history reports, the first  
412 autochthonous transmission of CHIKV in Manaus was linked to an index patient  
413 who reported spending holidays in Feira de Santana (Bahia state) in early 2015,  
414 during a period when this city was experiencing a large CHIKV outbreak [5]. The  
415 date of *node A* was estimated to be around mid-July 2014 (95% BCI: early Jul – late  
416 Aug 2014), shortly after the arrival of the presumed index case in Feira de Santana,  
417 Bahia [5]. This is in line with a single introduction to Bahia (*node A*), followed by



418 subsequent waves of transmission across the northeast and southeast regions of Brazil  
419 [5, 48, 49]. Our demographic reconstructions indicate that the outbreak in Roraima  
420 2017 probably represents the third epidemic wave spreading across Brazil (**Figure**  
421 **S3**).

422 Next, we used notified case counts to estimate the basic reproductive  
423 number,  $R_0$ , of the epidemic.  $R_0$  is the average number of secondary cases caused by  
424 an infected individual and can be estimated from epidemic growth rates during its  
425 early exponential phase [43]. We find that  $R_0 \approx 1.66$  (95% CI: 1.51 – 1.83), in line  
426 with previous reports from other settings [50-52]. A sensitivity analysis considering  
427 different exponential growth phase periods resulted in a lower bound for  $R_0$  of  
428 around 1.23 (**Figure S4**). To gain insights into the possible magnitude of the  
429 outbreak and local surveillance capacity we used the equilibrium end state of a  
430 simple susceptible-infected-recovered (SIR) model:  $N = S + I + R$ ,  $S \sim 1/R_0$ ,  $I \sim 0$ ,  
431 with  $N$  being the total population size of Roraima. Using this simple mathematical  
432 approach, we obtain an attack rate (R) of 0.39 (95% CI: 0.36 – 0.45), slightly lower  
433 than elsewhere in Brazil [12, 15]. This corresponds to an estimated 110,882 (95%  
434 CI: 102,352 – 127,940) infected individuals, and a case detection rate of 5.34%  
435 (95% CI: 4.63 – 5.79). This implies that approximately 1 case was notified for  
436 every 19 infections. If we assume 32.7 – 41.2% of the estimated infections are  
437 symptomatic, as previously reported in Bahia and Sergipe [53], then we estimate  
438 that the local observation success of symptomatic cases was between 12.8 –  
439 16.1%. However, if we assume that 75 – 97% of people infected with CHIKV will  
440 develop symptomatic infections, as reported for the Indian Ocean lineage [10, 54,  
441 55], then the chances of reported a symptomatic CHIKV case decrease to 5 – 7%  
442 [9]. Case reports suggest that the beginning of the exponential phase of the  
443 outbreak was in December 2016 (**Figure S4**), while genetic data suggests that the  
444 outbreak clade emerged around July 2016. However, between August 2014 and  
445 June 2016, 612 CHIKV notified cases and 40 confirmed cases were reported by the  
446 LACEN-RR. It is therefore likely that prior to Jan 2017, low but non-neglectable  
447 transmission of the Asian genotype occurred in Roraima.

448 We investigated the public's awareness of the chikungunya outbreak by  
449 retrospectively monitoring Google searches of the search term “chikungunya” in  
450 Roraima state from January 2014 to July 2018 (**Figure 4**). As a comparison, we



451 performed a similar search focusing on the neighbouring state of Amazonas. We  
452 found that web search activity and CHIKV cases counts in Roraima are highly  
453 correlated (notified cases:  $r = 0.89$ ; confirmed cases:  $r = 0.92$ , **Figure 4d – e**).  
454 Additionally, the timing of the peak of Google searches corresponds to that of  
455 notified and confirmed cases with a peak in July 2017 (**Figure 4a and c, Figure 4b**  
456 **and f**). It is important to note that web search activity was available weeks or  
457 months before the final number of confirmed (and suspected) cases were made  
458 publicly available. This fact highlights the potential utility of monitoring disease-  
459 related searches during the outbreak. Interestingly, we find some web-search  
460 activity in Roraima before June 2016, particularly in September 2014, March 2015  
461 and March 2016 (**Figure 4f**). These patterns are distinct to those in the Amazonas  
462 neighbouring state (notified cases:  $r = 0.65$ ; confirmed cases:  $r = 0.15$ ), which  
463 shows an early peak in November 2014, soon after the estimated age of *node B*  
464 (**Figure 3b**), followed by a peak in February 2016 and another in March 2017  
465 (**Figure 4c**). These multiple peaks in internet search queries are consistent with the  
466 timing of at least 3 introductions detected in our phylogenetic analyses (**Figure**  
467 **3b**), each possibly resulting in small epidemic waves of CHIKV in Manaus and  
468 Amazonas states.

## 469 **Discussion**

470 We describe a genomic epidemiological study which used genetic,  
471 epidemiological, and digital search data to investigate an outbreak caused by CHIKV  
472 in Boa Vista city, Roraima state, northern Brazil, in 2017. Using a combination of  
473 genetic, laboratory-confirmed and -suspected, and digital search data from 2014 to  
474 2018, we find evidence for the replacement of the Asian lineage by the ECSA lineage  
475 in the north of Brazil. Moreover, we find that ECSA lineage was introduced in  
476 Roraima around July 2016, six months before the beginning of the exponential  
477 increase in case numbers. Using simple epidemiological modes, we find that on  
478 average 1 in 17 (95% CI: 14 – 20) symptomatic CHIKV cases, a fraction of the  
479 110,882 (95% CI: 102,352 – 127,940) estimated number of infections, sought  
480 medical care during the outbreak of CHIKV ECSA in Roraima. Finally, we find that  
481 Google search activity data shows a strong association with CHIKV notified cases in  
482 Roraima. Moreover, although the nanopore-based sequencing protocol for CHIKV  
483 utilized in this study has been described and validated previously [32], this study  
484 represent to our knowledge the first effort to generate on-site complete CHIKV  
485 genome sequences. Our results provide evidence of lineage replacement in Brazil, and  
486 to the best of our knowledge, deliver a description of the largest outbreak ever  
487 reported in north Brazil, revealing the circulation of the ECSA lineage in the Amazon  
488 region.

489 We estimate that 39% (95% CI: 36 – 45)% of Roraima's population was  
490 infected with CHIKV-ECSA-Br during the outbreak in 2017. Our estimates are higher  
491 than the 20% seropositive observed in a rural community in Bahia [10], and slightly  
492 lower than the 45.7 – 57.1% observed in two serosurveys conducted in the same state  
493 [12], where the ECSA lineage also seems to predominate. The observed differences  
494 in terms of the proportion of the population exposed to CHIKV in Roraima  
495 compared to previous estimates from the northeast region could result from partial  
496 protection resulting from low-level transmission of the CHIKV-Asian genotype  
497 during 2014 – 2016 in the north region. Alternatively, some level of cross-  
498 protection could have been conferred by previous exposure to Mayaro virus  
499 (MAYV); Mayaro is an antigenically-related alphavirus that may provide some  
500 level of cross-reactivity [56, 57] and is associated with *Haemagogus* spp. vectors  
501 [58], but has also been identified in *Culex quinquefasciatus* and *Aedes aegypti*  
502 mosquitoes [59]. MAYV has been detected in the north [60-64] and centre-west

503 [21, 59, 65-68] regions of Brazil. Moderate to high prevalence of MYV IgM have  
504 been found in urban northern areas [60], which could explain the limited spread of  
505 CHIKV in Manaus compared to Roraima.

506 Different CHIKV circulating lineages may have remarkably different public  
507 health consequences. Lineage-specific clinical presentations have been recently  
508 highlighted by a recent index cluster study which showed that 82% of CHIKV  
509 infections caused by the ECSA lineage are symptomatic, in comparison to only 52%  
510 of symptomatic infections caused by the Asian genotype [54]. While the Asian  
511 lineage seems to have circulated cryptically for 9 months before its first detection in  
512 the Caribbean [3], the faster detection of the ECSA lineage in Brazil could at least in  
513 part be a consequence of a higher rate of symptomatic to asymptomatic infections of  
514 the ECSA lineage circulating in Brazil. The time lag between the phylogenetic  
515 estimate of the date of introduction of a virus lineage and the date of the first  
516 confirmed case in a given region, enables us to identify surveillance gaps between the  
517 arrival and discovery of a virus in that region [69].

518 We used genomic data collected over a 3-year period to estimate the genetic  
519 history of the CHIKV-ECSA-Br lineage. We estimate that the CHIKV-ECSA-Br  
520 lineage arrived in Roraima around July 2016, whilst the first confirmed CHIKV cases  
521 in Roraima occurred earlier, in August 2014. That the discovery date anticipates the  
522 estimated date of introduction can be explained by initial introduction(s) of the Asian  
523 lineage (from the north of Brazil or from other south American regions) resulting in  
524 only limited onwards transmission, followed by the replacement of the Asian lineages  
525 by an epidemiological successful ECSA lineage. Transmission of the Asian genotype  
526 during this period is in line with an increase in notified and confirmed cases, as well  
527 internet search query data between August 2014 and June 2016. Nationwide  
528 molecular and seroprevalence studies combined with epidemiological modelling [70]  
529 will help to determine the proportion of cases caused by the ECSA compared to the  
530 Asian lineage in different geographic settings, and to identify which populations are  
531 still at risk of infection in Brazil.

532 We estimated high rates of nucleotide substitution for this lineage, which  
533 equates to around 8 (95% BCI: 6 – 11) nucleotide substitutions per year across the  
534 virus genome. Such rates are similar to the evolutionary rates estimated for the IOL  
535 lineage; these are typical of urban and epidemic transmission cycles in locations with  
536 an abundance of suitable hosts and lack of herd immunity [8]. None of the mutations

537 associated previously with increased transmissibility of the IOL lineage in *Ae.*  
538 *albopictus* mosquitos in the Indian Ocean region were identified in this study.  
539 However, it is currently unclear whether we should expect the same mutations to be  
540 linked with increased transmission in *Aedes* spp. populations both from Brazil and  
541 from Southeast Asia. Further, it is possible that CHIKV in Brazil is vectored mainly  
542 by the *Ae. aegypti* vector that is abundant throughout Brazil [71]. In line with this,  
543 CHIKV-ECSA was recently detected in *Aedes aegypti* from Maranhão [72] and Rio  
544 de Janeiro states [73].

545         The past dengue serotype 4 genotype II outbreak in Brazil ignited in the north  
546 of the country, and is inferred to have been introduced from Venezuela to Roraima,  
547 before spreading to the northeast and southeast region of Brazil [74]. Our genetic  
548 analysis reveals at least four instances of ECSA-Br virus lineage migration in the  
549 opposite direction, i.e., from northeastern to northern Brazil. Such a pattern may not  
550 be surprising due to the year-round persistence of *Aedes aegypti* mosquitos in the  
551 northeast and the north areas [31]. Within-country transmission will be dictated by  
552 human mobility, climatic synchrony, and levels of population immunity. Moreover,  
553 international spread of the ECSA-Br lineage is expected to regions linked to Brazil.  
554 Previous analyses of dengue virus serotypes has identified a strong connectivity  
555 between north Brazil and Venezuela [25, 75], and northeast Brazil and Haiti [31, 76].  
556 In addition, Angola and Brazil are linked by human mobility and synchronous  
557 climates that have facilitated the migration of CHIKV-ECSA [1] and Zika virus  
558 (<http://virological.org/t/circulation-of-the-asian-lineage-zika-virus-in-angola/248>).

559         Improving surveillance in the Amazon region may help anticipate  
560 transmission of vector-borne diseases and also spillover from wild mammals of  
561 zoonotic viruses of particular concern [27]. Genomic portable sequencing of vector-  
562 borne viral infections in the Amazon may be particularly important in the context of  
563 early identification of circulation of strains newly (re)-introduced from wildlife. For  
564 example, yellow fever strains collected in Roraima seem to be at the source of the  
565 2016-2018 yellow fever virus outbreak in southeast Brazil, which has affected large  
566 urban centres in Minas Gerais, São Paulo and Rio de Janeiro [26]. In the near future,  
567 the increasing rapidity and decreasing cost of genome sequencing in poorly sampled  
568 areas, combined with emerging theoretical approaches [77], will facilitate the  
569 investigation of possible associations between arbovirus lineage diversity, mosquito  
570 vectors, reservoir species, and transmission potential.

571 Finally, the reported synchronicities between notified chikungunya case  
572 counts in Roraima and the chikungunya-related Internet searches originated in the  
573 region highlight the potential complementarity that Internet search activity may offer  
574 in future disease outbreaks. Specifically, given that disease-related search activity can  
575 be monitored in near-real time, early signals of increases in disease activity may be  
576 spotted weeks or months before lab-confirmed case counts may be available in an  
577 unfolding outbreak.

578

### 579 **Acknowledgments**

580 We are thankful to all personnel from SVS/MS, PAHO/Brazil, Roraima and Boa  
581 Vista Health Surveillance System that coordinated surveillance and helped with data  
582 collection and assembly. We thank Oxford Nanopore Technologies for the support to  
583 the ZIBRA-2 (Zika in Brazil Real time Analyses-second round) project with  
584 additional flowcells and corresponding reagents, and also thank QIAGEN for  
585 donation of consumables.

586

587 **Figure Legends**

588 **Figure 1. Context of this study.** A. Map showing municipalities of Roraima state,  
589 including Boa Vista, bordering countries (Venezuela and French Guiana) and  
590 bordering Brazilian federal states (Amazonas and Pará). B. Map of Brazilian states,  
591 showing the states from which CHIKV sequence data in this study was analysed  
592 (Bahia, Alagoas, Pernambuco, Paraíba, Amazonas and Roraima). C. Barplot showing  
593 the annual number of notified CHIKV cases in selected states of Brazil (data obtained  
594 from the Brazilian Ministry of Health). Map was made with Natural Earth. Free  
595 vector and raster map data at [naturalearthdata.com](http://naturalearthdata.com).

596

597

598 **Fig. 2. Sequencing statistics, temporal signal and evolutionary rates of the**  
599 **CHIKV-ECSA lineage.** A. Genome coverage plotted against RT-qPCR CT-values  
600 for the newly generated sequence data. B. Genetic divergence regressed against dates  
601 of sample collection for dataset 2 (CHIKV-ECSA-Br lineage). C. Evolutionary rate  
602 estimates for the CHIKV-ECSA-Br lineage obtained by this study (circle number 1)  
603 compared to published evolutionary rates obtained for other lineages. Circles  
604 numbered 2 to 8 represent point estimates reported in [1, 8, 78]. Horizontal bars  
605 represent 95% highest posterior density credible intervals for associated evolutionary  
606 rates.

607

608 **Figure 3. Genetic analysis of the CHIKV-ECSA genotype.** A. Maximum likelihood  
609 phylogeny depicting the monophyletic clade containing all the Brazilian ECSA  
610 isolates (ECSA-Br lineage). B. Time-calibrated phylogeny of all available CHIKV-  
611 ECSA whole genome sequences from Brazil, including 18 novel genomes from  
612 Roraima and Amazonas states. Colours correspond to state of sample collection.  
613 Violin plots show 95% Bayesian credible intervals for associated node heights [38].

614

615 **Figure 4. Digital surveillance of chikungunya disease in northern Brazil.** A and B  
616 show respectively the number of notified CHIKV cases in LACEN-RR and LACEN-  
617 AM between Jan 2014 and Sep 2018. Panels C and F show Google Trends activity for  
618 the term “chikungunya” in Amazonas (C) and Roraima (F) from Jan 2016 and Sep  
619 2018. Panels D and G show the correlation between Google Trends activity and  
620 confirmed cases in Amazonas (D) and Roraima (G), while panels E and H show the

621 correlation between Google Trends activity and notified cases in Amazonas (E) and  
622 Roraima (H).

623 **Table 1.** Epidemiological data for virus isolates from Roraima (RR) and Amazonas  
624 (AM). CT=cycle threshold, *d*=days from onset of symptoms to sample collection.  
625 Corresponding sequencing statistics are available in **Table S1**. Isolates were  
626 collected around 2.3 (range: 0 – 5) days after onset of symptoms. Acc. Number =  
627 GenBank accession number.

628

| Isolate | State,<br>Municipality | Acc.<br>Number | Ct RT-<br>qPCR | Coverage<br>(%) | Age,<br>Sex | Collection<br>date | <i>d</i> |
|---------|------------------------|----------------|----------------|-----------------|-------------|--------------------|----------|
| AMA290  | AM, Manaus             | MK121891       | NA             | 90.2            | 76, F       | 15/07/2015         | 5        |
| AMA291  | AM, Manaus             | MK121892       | NA             | 80.7            | 48, F       | 15/07/2015         | 4        |
| AMA292  | AM, Manaus             | MK121893       | NA             | 90.2            | 50, M       | 15/07/2015         | 0        |
| AMA293  | AM, Manaus             | MK121894       | NA             | 84.4            | 42, M       | 31/01/2016         | 4        |
| AMA294  | RR, Boa Vista          | MK134712       | NA             | 90.2            | 45, F       | 01/12/2014         | 2        |
| AMA295  | RR, Unknown            | MK134713       | NA             | 90.2            | 9, F        | 11/11/2014         | 1        |
| AMA74   | AM, Manaus             | MK121895       | 15             | 90.2            | 32, F       | 20/03/2017         | 2        |
| AMA346  | RR, Boa Vista          | MK121896       | 13.7           | 90.2            | 30, F       | 03/03/2017         | 1        |
| AMA350  | RR, Bonfim             | MK121897       | 27.15          | 54.7            | 32, F       | 20/02/2017         | 1        |
| AMA352  | RR, Boa Vista          | MK121898       | 17.33          | 88.6            | 3, F        | 22/02/2017         | 1        |
| AMA354  | RR, Boa Vista          | MK121899       | 23.36          | 86.9            | 19, F       | 17/03/2017         | 1        |
| AMA362  | RR, Iracema            | MK121900       | 18.63          | 88.6            | 31, F       | 17/03/2017         | 1        |
| AMA364  | RR, Boa Vista          | MK121901       | 25.93          | 83.3            | 19, F       | 17/03/2017         | 2        |
| AMA366  | RR, Boa Vista          | MK121902       | 19.87          | 90.0            | 36, F       | 17/03/2017         | 2        |
| AMA368  | RR, Boa Vista          | MK121903       | 25.91          | 93.1            | 26, F       | 15/03/2017         | 2        |
| AMA369  | RR, Boa Vista          | MK121904       | 21.55          | 95.6            | 52, M       | 02/03/2017         | 3        |
| AMA374  | RR, Boa Vista          | MK121905       | 27.41          | 71.4            | 64, F       | 02/03/2017         | 4        |
| AMA379  | RR, Boa Vista          | MK121906       | 17.5           | 96.1            | 38, F       | 27/02/2017         | 4        |
| AMA381  | RR, Boa Vista          | MK121907       | 16.66          | 97.7            | 31, F       | 27/02/2017         | 4        |
| AMA382  | RR, Boa Vista          | MK121908       | 14.58          | 76.6            | 30, F       | 05/03/2017         | 1        |

629

630

631

632

633

634

635

636 **Supplementary Figure Legends**

637 **Figure S1. Maximum likelihood phylogenetic tree of the CHIKV Asian genotype.**

638 Includes isolates from Southeast Asia, Americas and Brazil. Isolates represented by  
639 blue tips were sampled in Roraima, while isolates shown in red represent other strains  
640 sampled in Brazil.

641

642 **Figure S2. Dating estimates obtained under different coalescent models.**

643 Estimates for node A (time of the most recent common ancestor, in dark red, see  
644 Figure 3b), node B (main Amazonas clade, in green), and node C (Roraima clade, in  
645 purple) are shown for different non-parametric models (Bayesian skygrid, skyride,  
646 skyline) and for a simple constant population size model.

647

648 **Figure S3. Demographic dynamics of CHIKV ECSA-Brazilian lineage in Brazil.**

649 Fluctuation of effective population size over time as inferred through a Bayesian  
650 skygrid coalescent model.

651

652 **Figure S4. Exponential Period of the CHIKV epidemic in Boa Vista**

653 **municipality, Roraima state.** Log number of notified cases per month are plotted  
654 against number of months since January 2015.

655

656

657

658

659

660

661

662

663

664

665

666

667

668

669



670 **Supplementary Table**

671 **Table S1. Minion sequencing statistics**

672

| <b>Isolate</b> | <b>Mapped reads</b> | <b>Average depth coverage</b> | <b>Bases covered &gt;10x</b> | <b>Bases covered &gt; 25x</b> | <b>Reference covered (%)</b> |
|----------------|---------------------|-------------------------------|------------------------------|-------------------------------|------------------------------|
| AMA290         | 13624               | 767                           | 10276                        | 10258                         | 90.2                         |
| AMA291         | 60261               | 2047                          | 9489                         | 9280                          | 80.7                         |
| AMA292         | 68090               | 2746                          | 10402                        | 10223                         | 90.2                         |
| AMA293         | 64953               | 2096                          | 9745                         | 9701                          | 84.4                         |
| AMA294         | 21361               | 701                           | 10252                        | 10022                         | 90.2                         |
| AMA295         | 16370               | 531                           | 10188                        | 10077                         | 90.2                         |
| AMA74          | 42276               | 1951                          | 10396                        | 10195                         | 90.2                         |
| AMA346         | 31210               | 1225                          | 10243                        | 10208                         | 90.2                         |
| AMA350         | 63672               | 1673                          | 7522                         | 7168                          | 54.7                         |
| AMA352         | 13530               | 536                           | 10219                        | 10184                         | 88.6                         |
| AMA354         | 22214               | 752                           | 10082                        | 9985                          | 86.9                         |
| AMA362         | 9938                | 398                           | 10237                        | 10128                         | 88.6                         |
| AMA364         | 28494               | 1079                          | 9813                         | 9577                          | 83.3                         |
| AMA366         | 38228               | 1441                          | 10264                        | 10224                         | 90.0                         |
| AMA368         | 12968               | 503                           | 11122                        | 10825                         | 93.1                         |
| AMA369         | 7280                | 311                           | 11225                        | 11149                         | 95.6                         |
| AMA374         | 7030                | 305                           | 10225                        | 8805                          | 71.4                         |
| AMA379         | 7970                | 348                           | 11226                        | 11092                         | 96.1                         |
| AMA381         | 7522                | 327                           | 11214                        | 11208                         | 97.7                         |
| AMA382         | 14040               | 411                           | 9915                         | 9424                          | 76.6                         |

673

674

675

676 **References**

- 677 1. Nunes MR, Faria NR, de Vasconcelos JM, Golding N, Kraemer MU, de  
678 Oliveira LF, et al. Emergence and potential for spread of Chikungunya virus in  
679 Brazil. *BMC medicine*. 2015;13:102. Epub 2015/05/16. doi: 10.1186/s12916-  
680 015-0348-x. PubMed PMID: 25976325; PubMed Central PMCID: PMC4433093.
- 681 2. Organization PAWH. Number of Reported Cases of Chikungunya Fever in  
682 the Americas, by Country or Territory. Washington: 2017.
- 683 3. Sahadeo NSD, Allicock OM, De Salazar PM, Auguste AJ, Widen S,  
684 Olowokure B, et al. Understanding the evolution and spread of chikungunya virus  
685 in the Americas using complete genome sequences. *Virus Evol*.  
686 2017;3(1):vex010. Epub 2017/05/10. doi: 10.1093/ve/vex010. PubMed PMID:  
687 28480053; PubMed Central PMCID: PMC5413804.
- 688 4. Nsoesie EO, Kraemer MU, Golding N, Pigott DM, Brady OJ, Moyes CL, et al.  
689 Global distribution and environmental suitability for chikungunya virus, 1952 to  
690 2015. *Euro surveillance : bulletin Europeen sur les maladies transmissibles =*  
691 *European communicable disease bulletin*. 2016;21(20). Epub 2016/05/31. doi:  
692 10.2807/1560-7917.ES.2016.21.20.30234. PubMed PMID: 27239817; PubMed  
693 Central PMCID: PMC4902126.
- 694 5. Faria NR, Lourenco, J., Cerqueira, E. M., Lima, M. M., Pybus, O. G., Alcantara,  
695 L. C. J. Epidemiology of Chikungunya Virus in Bahia, Brazil, 2014-2015. *PLoS*  
696 *Currents Outbreaks*. 2016;1. doi:  
697 10.1371/currents.outbreaks.c97507e3e48efb946401755d468c28b2.
- 698 6. Johansson MA. Chikungunya on the move. *Trends in parasitology*.  
699 2015;31(2):43-5. Epub 2015/02/05. doi: 10.1016/j.pt.2014.12.008. PubMed  
700 PMID: 25649340; PubMed Central PMCID: PMC4583061.
- 701 7. Kraemer MUG, Sinka, M. E., Duda, K. A., Mylne, A., Shearer, F. M., Barker, C.  
702 M., Moore, C. G., Carvalho, R. G., Coelho, G. E., Bortel, W. V., Hendrickx, G.,  
703 Schaffner, F., Elyazar, I. R. F., Teng, H. J., Brady, O. J., Messina, J. P., Pigott, D., M.,  
704 Scott, T. W., Smith, D. L., Wint, G. R. W., Golding, N., Hay, S. I. The global  
705 distribution of the arbovirus vectors *Aedes aegypti* and *Ae. albopictus*. *eLife*.  
706 2015;10.7554(eLife.08347).
- 707 8. Volk SM, Chen R, Tsetsarkin KA, Adams AP, Garcia TI, Sall AA, et al.  
708 Genome-scale phylogenetic analyses of chikungunya virus reveal independent

- 709 emergences of recent epidemics and various evolutionary rates. *Journal of*  
710 *virology*. 2010;84(13):6497-504. Epub 2010/04/23. doi: 10.1128/JVI.01603-09.  
711 PubMed PMID: 20410280; PubMed Central PMCID: PMC2903258.
- 712 9. Staples JE, Breiman RF, Powers AM. Chikungunya fever: an  
713 epidemiological review of a re-emerging infectious disease. *Clinical infectious*  
714 *diseases* : an official publication of the Infectious Diseases Society of America.  
715 2009;49(6):942-8. Epub 2009/08/12. doi: 10.1086/605496. PubMed PMID:  
716 19663604.
- 717 10. Cunha RV, Trinta KS, Montalbano CA, Sucupira MV, de Lima MM, Marques  
718 E, et al. Seroprevalence of Chikungunya Virus in a Rural Community in Brazil.  
719 *PLoS Negl Trop Dis*. 2017;11(1):e0005319. Epub 2017/01/21. doi:  
720 10.1371/journal.pntd.0005319. PubMed PMID: 28107342; PubMed Central  
721 PMCID: PMC5287455.
- 722 11. Figueiredo LTM. Large outbreaks of Chikungunya virus in Brazil reveal  
723 uncommon clinical features and fatalities. *Revista da Sociedade Brasileira de*  
724 *Medicina Tropical*. 2017;50(5):583-4. Epub 2017/11/22. doi: 10.1590/0037-  
725 8682-0397-2017. PubMed PMID: 29160502.
- 726 12. Dias JP, Costa M, Campos GS, Paixao ES, Natividade MS, Barreto FR, et al.  
727 Seroprevalence of Chikungunya Virus after Its Emergence in Brazil. *Emerging*  
728 *infectious diseases*. 2018;24(4):617-24. Epub 2018/03/20. doi:  
729 10.3201/eid2404.171370. PubMed PMID: 29553317; PubMed Central PMCID:  
730 PMC5875253.
- 731 13. Brito CAA, Teixeira MG. Increased number of deaths during a  
732 chikungunya epidemic in Pernambuco, Brazil. *Memorias do Instituto Oswaldo*  
733 *Cruz*. 2017;112(9):650-1. Epub 2017/09/14. doi: 10.1590/0074-02760170124.  
734 PubMed PMID: 28902292; PubMed Central PMCID: PMC5572452.
- 735 14. Freitas ARR, Cavalcanti L, Von Zuben AP, Donalizio MR. Excess Mortality  
736 Related to Chikungunya Epidemics in the Context of Co-circulation of Other  
737 Arboviruses in Brazil. *PLoS currents*. 2017;9. Epub 2017/12/22. doi:  
738 10.1371/currents.outbreaks.14608e586cd321d8d5088652d7a0d884. PubMed  
739 PMID: 29263941; PubMed Central PMCID: PMC5731794.
- 740 15. Cunha MDP, Santos CAD, Neto DFL, Schanoski AS, Pour SZ, Passos SD, et  
741 al. Outbreak of chikungunya virus in a vulnerable population of Sergipe, Brazil-A

- 742 molecular and serological survey. *Journal of clinical virology* : the official  
743 publication of the Pan American Society for Clinical Virology. 2017;97:44-9. Epub  
744 2017/11/04. doi: 10.1016/j.jcv.2017.10.015. PubMed PMID: 29100064.
- 745 16. Silva MM, Rodrigues MS, Paploski IA, Kikuti M, Kasper AM, Cruz JS, et al.  
746 Accuracy of Dengue Reporting by National Surveillance System, Brazil. *Emerging*  
747 *infectious diseases*. 2016;22(2):336-9. Epub 2016/01/27. doi:  
748 10.3201/eid2202.150495. PubMed PMID: 26812472; PubMed Central PMCID:  
749 PMC4734515.
- 750 17. Pessoa R, Patriota JV, Lourdes de Souza M, Felix AC, Mamede N, Sanabani  
751 SS. Investigation Into an Outbreak of Dengue-like Illness in Pernambuco, Brazil,  
752 Revealed a Cocirculation of Zika, Chikungunya, and Dengue Virus Type 1.  
753 *Medicine*. 2016;95(12):e3201. Epub 2016/03/26. doi:  
754 10.1097/MD.00000000000003201. PubMed PMID: 27015222; PubMed Central  
755 PMCID: PMC4998417.
- 756 18. Sardi SI, Somasekar S, Naccache SN, Bandeira AC, Tauro LB, Campos GS, et  
757 al. Coinfections of Zika and Chikungunya Viruses in Bahia, Brazil, Identified by  
758 Metagenomic Next-Generation Sequencing. *Journal of clinical microbiology*.  
759 2016;54(9):2348-53. doi: 10.1128/JCM.00877-16. PubMed PMID: 27413190;  
760 PubMed Central PMCID: PMC4998417.
- 761 19. Cardoso CW, Paploski IA, Kikuti M, Rodrigues MS, Silva MM, Campos GS, et  
762 al. Outbreak of Exanthematous Illness Associated with Zika, Chikungunya, and  
763 Dengue Viruses, Salvador, Brazil. *Emerging infectious diseases*.  
764 2015;21(12):2274-6. Epub 2015/11/20. doi: 10.3201/eid2112.151167. PubMed  
765 PMID: 26584464; PubMed Central PMCID: PMC4672408.
- 766 20. Mavian C, Rife BD, Dollar JJ, Cella E, Ciccozzi M, Prospero MCF, et al.  
767 Emergence of recombinant Mayaro virus strains from the Amazon basin.  
768 *Scientific reports*. 2017;7(1):8718. Epub 2017/08/20. doi: 10.1038/s41598-  
769 017-07152-5. PubMed PMID: 28821712; PubMed Central PMCID:  
770 PMC5562835.
- 771 21. Vieira CJ, Silva DJ, Barreto ES, Siqueira CE, Colombo TE, Ozanic K, et al.  
772 Detection of Mayaro virus infections during a dengue outbreak in Mato Grosso,  
773 Brazil. *Acta Trop*. 2015;147:12-6. Epub 2015/03/31. doi:  
774 10.1016/j.actatropica.2015.03.020. PubMed PMID: 25817238.

- 775 22. Del Valle SY, McMahon BH, Asher J, Hatchett R, Lega JC, Brown HE, et al.  
776 Summary results of the 2014-2015 DARPA Chikungunya challenge. *BMC*  
777 *infectious diseases*. 2018;18(1):245. Epub 2018/05/31. doi: 10.1186/s12879-  
778 018-3124-7. PubMed PMID: 29843621; PubMed Central PMCID:  
779 PMC5975673.
- 780 23. Silva NMD, Teixeira RAG, Cardoso CG, Siqueira Junior JB, Coelho GE,  
781 Oliveira ESF. Chikungunya surveillance in Brazil: challenges in the context of  
782 Public Health. *Epidemiol Serv Saude*. 2018;27(3):e2017127. Epub 2018/09/06.  
783 doi: 10.5123/S1679-49742018000300003. PubMed PMID: 30183867.
- 784 24. Bogoch, II, Brady OJ, Kraemer MUG, German M, Creatore MI, Kulkarni MA,  
785 et al. Anticipating the international spread of Zika virus from Brazil. *Lancet*.  
786 2016;387(10016):335-6. Epub 2016/01/19. doi: 10.1016/S0140-  
787 6736(16)00080-5. PubMed PMID: 26777915; PubMed Central PMCID:  
788 PMC4873159.
- 789 25. Nunes MR, Faria NR, Vasconcelos HB, Medeiros DB, Silva de Lima CP,  
790 Carvalho VL, et al. Phylogeography of dengue virus serotype 4, Brazil, 2010-  
791 2011. *Emerging infectious diseases*. 2012;18(11):1858-64. doi:  
792 10.3201/eid1811.120217. PubMed PMID: 23092706; PubMed Central PMCID:  
793 PMC3559147.
- 794 26. Faria NR, Kraemer MUG, Hill SC, Goes de Jesus J, Aguiar RS, Iani FCM, et al.  
795 Genomic and epidemiological monitoring of yellow fever virus transmission  
796 potential. *Science*. 2018;361(6405):894-9. Epub 2018/08/25. doi:  
797 10.1126/science.aat7115. PubMed PMID: 30139911.
- 798 27. Olival KJ, Hosseini PR, Zambrana-Torrel C, Ross N, Bogich TL, Daszak P.  
799 Host and viral traits predict zoonotic spillover from mammals. *Nature*.  
800 2017;546(7660):646-50. Epub 2017/06/22. doi: 10.1038/nature22975.  
801 PubMed PMID: 28636590; PubMed Central PMCID: PMC5570460.
- 802 28. Weiss DJ, Nelson A, Gibson HS, Temperley W, Peedell S, Lieber A, et al. A  
803 global map of travel time to cities to assess inequalities in accessibility in 2015.  
804 *Nature*. 2018;553(7688):333-6. Epub 2018/01/11. doi: 10.1038/nature25181.  
805 PubMed PMID: 29320477.
- 806 29. Naveca FG, Nascimento VAD, Souza VC, Nunes BT, Rodrigues DSG,  
807 Vasconcelos P. Multiplexed reverse transcription real-time polymerase chain

- 808 reaction for simultaneous detection of Mayaro, Oropouche, and Oropouche-like  
809 viruses. *Memorias do Instituto Oswaldo Cruz*. 2017;112(7):510-3. Epub  
810 2017/06/08. doi: 10.1590/0074-02760160062. PubMed PMID: 28591313;  
811 PubMed Central PMCID: PMC5452489.
- 812 30. Lanciotti RS, Kosoy OL, Laven JJ, Panella AJ, Velez JO, Lambert AJ, et al.  
813 Chikungunya virus in US travelers returning from India, 2006. *Emerging*  
814 *infectious diseases*. 2007;13(5):764-7. doi: 10.3201/eid1305.070015. PubMed  
815 PMID: 17553261; PubMed Central PMCID: PMC52738459.
- 816 31. Faria NR, Quick J, Claro IM, Theze J, de Jesus JG, Giovanetti M, et al.  
817 Establishment and cryptic transmission of Zika virus in Brazil and the Americas.  
818 *Nature*. 2017;546(7658):406-10. Epub 2017/05/26. doi: 10.1038/nature22401.  
819 PubMed PMID: 28538727; PubMed Central PMCID: PMC5722632.
- 820 32. Quick J. G., N. D., Pullan, S. T., Claro, I. M., Smith, A. D., Gangavarapu, k.,  
821 Oliveira, G., Robles-Sikisaka, R., Rogers, T. F., Beutler, N. A., Burton, D. R., Lewis-  
822 Ximenez, L. L., de Jesus, J. G., Giovanetti, M., Hill, S., Black, A., Bedford, T., Carroll,  
823 M. W., Nunes, M., Alcantara, L. C., Sabino, E. C., Baylis, S. A., Faria, N. R., Loose, M.,  
824 Simpson, J. T., Pybus, O. G., Andersen, K. G., Loman, N. J. Multiplex PCR method for  
825 MinION and Illumina sequencing of Zika and other virus genomes directly from  
826 clinical samples. *Nature Protocols*. 2017;XX(XX):XX.
- 827 33. Clark K, Karsch-Mizrachi I, Lipman DJ, Ostell J, Sayers EW. GenBank.  
828 *Nucleic acids research*. 2016;44(D1):D67-72. doi: 10.1093/nar/gkv1276.  
829 PubMed PMID: 26590407; PubMed Central PMCID: PMC4702903.
- 830 34. da Costa AC, Thézé, J., Komninakis, S. C. V., Sanz-Duro, R. L., Felinto, M. R.  
831 L., Moura, L. C. C., Barroso, I. M. O., Santos, L. E. C., Nunes, M. A., L., Moura, A. A.,  
832 Lourenco, J., Deng, X., Delwart, E. L., Guimaraes, M. R. A. S., Pybys, O. G., Sabino, E.  
833 C., Faria, N. R. Spread of Chikungunya Virus East/Central/South African Genotype  
834 in Northeast Brazil. *Emerging infectious diseases*. 2017;23(10).
- 835 35. Bruen TC, Philippe H, Bryant D. A simple and robust statistical test for  
836 detecting the presence of recombination. *Genetics*. 2006;172(4):2665-81. doi:  
837 10.1534/genetics.105.048975. PubMed PMID: 16489234; PubMed Central  
838 PMCID: PMC1456386.
- 839 36. Stamatakis A. RAxML version 8: a tool for phylogenetic analysis and post-  
840 analysis of large phylogenies. *Bioinformatics*. 2014;30(9):1312-3. doi:



- 841 10.1093/bioinformatics/btu033. PubMed PMID: 24451623; PubMed Central  
842 PMCID: PMCPMC3998144.
- 843 37. Rambaut A, Lam, T. T., Fagundes de Carvalho, L., Pybus, O. G. Exploring the  
844 temporal structure of heterochronous sequences using TempEst (formerly Path-  
845 O-Gen). *Virus Evolution*. 2016;2(vew007).
- 846 38. Suchard MA, Lemey P, Baele G, Ayres DL, Drummond AJ, Rambaut A.  
847 Bayesian phylogenetic and phylodynamic data integration using BEAST 1.10.  
848 *Virus Evol.* 2018;4(1):vey016. Epub 2018/06/27. doi: 10.1093/ve/vey016.  
849 PubMed PMID: 29942656; PubMed Central PMCID: PMCPMC6007674.
- 850 39. Drummond AJ, Rambaut A, Shapiro B, Pybus OG. Bayesian coalescent  
851 inference of past population dynamics from molecular sequences. *Molecular*  
852 *biology and evolution*. 2005;22(5):1185-92. doi: 10.1093/molbev/msi103.  
853 PubMed PMID: 15703244.
- 854 40. Minin VN, Bloomquist EW, Suchard MA. Smooth skyride through a rough  
855 skyline: Bayesian coalescent-based inference of population dynamics. *Molecular*  
856 *biology and evolution*. 2008;25(7):1459-71. Epub 2008/04/15. doi:  
857 10.1093/molbev/msn090. PubMed PMID: 18408232; PubMed Central PMCID:  
858 PMC3302198.
- 859 41. Gill MS, Lemey P, Faria NR, Rambaut A, Shapiro B, Suchard MA. Improving  
860 Bayesian population dynamics inference: a coalescent-based model for multiple  
861 loci. *Molecular biology and evolution*. 2013;30(3):713-24. doi:  
862 10.1093/molbev/mss265. PubMed PMID: 23180580; PubMed Central PMCID:  
863 PMC3563973.
- 864 42. Drummond AJ, Ho SY, Phillips MJ, Rambaut A. Relaxed phylogenetics and  
865 dating with confidence. *PLoS biology*. 2006;4(5):e88. doi:  
866 10.1371/journal.pbio.0040088. PubMed PMID: 16683862; PubMed Central  
867 PMCID: PMC1395354.
- 868 43. Lourenço J, Monteiro, M. L., Valdez, T., Rodrigues, J. M., Pybus, O. G., Faria,  
869 N. R. Epidemiology of the Zika virus outbreak in the Cabo Verde Islands, West  
870 Africa. *PLoS currents*. 2018. doi:  
871 10.1371/currents.outbreaks.19433b1e4d007451c691f138e1e67e8c.
- 872 44. Salje H, Lessler J, Paul KK, Azman AS, Rahman MW, Rahman M, et al. How  
873 social structures, space, and behaviors shape the spread of infectious diseases

- 874 using chikungunya as a case study. Proceedings of the National Academy of  
875 Sciences of the United States of America. 2016;113(47):13420-5. Epub  
876 2016/11/09. doi: 10.1073/pnas.1611391113. PubMed PMID: 27821727;  
877 PubMed Central PMCID: PMC5127331.
- 878 45. Chan EH, Sahai V, Conrad C, Brownstein JS. Using web search query data  
879 to monitor dengue epidemics: a new model for neglected tropical disease  
880 surveillance. PLoS Negl Trop Dis. 2011;5(5):e1206. Epub 2011/06/08. doi:  
881 10.1371/journal.pntd.0001206. PubMed PMID: 21647308; PubMed Central  
882 PMCID: PMC3104029.
- 883 46. Team RC. R: A Language and Environment for Computing. Vienna, Austria:  
884 R Foundation for Statistical Computing; 2014.
- 885 47. Tsetsarkin KA, McGee CE, Volk SM, Vanlandingham DL, Weaver SC, Higgs  
886 S. Epistatic roles of E2 glycoprotein mutations in adaption of chikungunya virus  
887 to *Aedes albopictus* and *Ae. aegypti* mosquitoes. PloS one. 2009;4(8):e6835.  
888 Epub 2009/09/01. doi: 10.1371/journal.pone.0006835. PubMed PMID:  
889 19718263; PubMed Central PMCID: PMC2729410.
- 890 48. Tanabe ELL, Tanabe ISB, Santos ECD, Marques J, Borges AA, Lima MC, et  
891 al. Report of East-Central South African Chikungunya virus genotype during the  
892 2016 outbreak in the Alagoas State, Brazil. Revista do Instituto de Medicina  
893 Tropical de Sao Paulo. 2018;60:e19. Epub 2018/04/26. doi: 10.1590/s1678-  
894 9946201860019. PubMed PMID: 29694603; PubMed Central PMCID:  
895 PMC5956549.
- 896 49. Charlys da Costa A, Theze J, Komninakis SCV, Sanz-Duro RL, Felinto MRL,  
897 Moura LCC, et al. Spread of Chikungunya Virus East/Central/South African  
898 Genotype in Northeast Brazil. Emerging infectious diseases. 2017;23(10):1742-4.  
899 Epub 2017/09/21. doi: 10.3201/eid2310.170307. PubMed PMID: 28930031;  
900 PubMed Central PMCID: PMC5621546.
- 901 50. Robinson M, Conan A, Duong V, Ly S, Ngan C, Buchy P, et al. A model for a  
902 chikungunya outbreak in a rural Cambodian setting: implications for disease  
903 control in uninfected areas. PLoS Negl Trop Dis. 2014;8(9):e3120. Epub  
904 2014/09/12. doi: 10.1371/journal.pntd.0003120. PubMed PMID: 25210729;  
905 PubMed Central PMCID: PMC4161325.



- 906 51. Perkins TA, Metcalf CJ, Grenfell BT, Tatem AJ. Estimating drivers of  
907 autochthonous transmission of chikungunya virus in its invasion of the americas.  
908 PLoS currents. 2015;7. Epub 2015/03/05. doi:  
909 10.1371/currents.outbreaks.a4c7b6ac10e0420b1788c9767946d1fc. PubMed  
910 PMID: 25737803; PubMed Central PMCID: PMC4339250.
- 911 52. Salje H, Cauchemez S, Alera MT, Rodriguez-Barraquer I, Thaisomboonsuk  
912 B, Srikiatkachorn A, et al. Reconstruction of 60 Years of Chikungunya  
913 Epidemiology in the Philippines Demonstrates Episodic and Focal Transmission.  
914 The Journal of infectious diseases. 2016;213(4):604-10. Epub 2015/09/28. doi:  
915 10.1093/infdis/jiv470. PubMed PMID: 26410592; PubMed Central PMCID:  
916 PMCPMC4721913.
- 917 53. Dias JP, Costa, M. C. N., Campos, G. S., Paixao, E. S., Natividade, M. S.,  
918 Barreto, F. R., Itaparica, M. S. C., Goes, C., Oliveira, F. L. S., Santana, E. B., Silva, N. S.  
919 J., Brito, C. A. A., Rodrigues, L. C., Sardi, S. I., Saavedra, R. C., Teixeira, M. G.  
920 Seroprevalence of Chikungunya Virus after Its Emergence in Brazil. Emerging  
921 infectious diseases. 2018;24(4):617-24.
- 922 54. Bustos Carrillo F, Collado D, Sanchez N, Ojeda S, Lopez Mercado B, Burger-  
923 Calderon R, et al. Epidemiological Evidence for Lineage-specific Differences in  
924 the Risk of Inapparent Chikungunya Virus Infection. Journal of virology. 2018.  
925 Epub 2018/11/23. doi: 10.1128/JVI.01622-18. PubMed PMID: 30463967.
- 926 55. Sissoko D, Moendandze A, Malvy D, Giry C, Ezzedine K, Solet JL, et al.  
927 Seroprevalence and risk factors of chikungunya virus infection in Mayotte, Indian  
928 Ocean, 2005-2006: a population-based survey. PloS one. 2008;3(8):e3066. Epub  
929 2008/08/30. doi: 10.1371/journal.pone.0003066. PubMed PMID: 18725980;  
930 PubMed Central PMCID: PMCPMC2518850.
- 931 56. Hassing RJ, Leparc-Goffart I, Tolou H, van Doornum G, van Genderen PJ.  
932 Cross-reactivity of antibodies to viruses belonging to the Semliki forest  
933 serocomplex. Euro surveillance : bulletin Europeen sur les maladies  
934 transmissibles = European communicable disease bulletin. 2010;15(23). Epub  
935 2010/06/16. PubMed PMID: 20546691.
- 936 57. Powers AM, Brault AC, Shirako Y, Strauss EG, Kang W, Strauss JH, et al.  
937 Evolutionary relationships and systematics of the alphaviruses. Journal of  
938 virology. 2001;75(21):10118-31. Epub 2001/10/03. doi:

- 939 10.1128/JVI.75.21.10118-10131.2001. PubMed PMID: 11581380; PubMed  
940 Central PMCID: PMC114586.
- 941 58. Vasconcelos PFC, Travassos da Rosa, A. P. A., Degallier, N., Travassos da  
942 Rosa, J. F. S., Pinheiro, F. R. Clinical and ecoepidemiological situation of human  
943 arboviruses in Brazilian Amazonia. *Journal of the Brazilian Association for the*  
944 *Advancement of Science.* 1992;43(2):117-24.
- 945 59. Serra OP, Cardoso BF, Ribeiro AL, Santos FA, Silhessarenko RD. Mayaro  
946 virus and dengue virus 1 and 4 natural infection in culicids from Cuiaba, state of  
947 Mato Grosso, Brazil. *Memorias do Instituto Oswaldo Cruz.* 2016;111(1):20-9.  
948 Epub 2016/01/20. doi: 10.1590/0074-02760150270. PubMed PMID: 26784852;  
949 PubMed Central PMCID: PMC4727432.
- 950 60. Mourao MP, Bastos Mde S, de Figueiredo RP, Gimaque JB, Galusso Edos S,  
951 Kramer VM, et al. Mayaro fever in the city of Manaus, Brazil, 2007-2008. *Vector*  
952 *borne and zoonotic diseases.* 2012;12(1):42-6. Epub 2011/09/20. doi:  
953 10.1089/vbz.2011.0669. PubMed PMID: 21923266; PubMed Central PMCID:  
954 PMC3249893.
- 955 61. Receveur MC, Grandadam M, Pistone T, Malvy D. Infection with Mayaro  
956 virus in a French traveller returning from the Amazon region, Brazil, January,  
957 2010. *Euro surveillance : bulletin Europeen sur les maladies transmissibles =*  
958 *European communicable disease bulletin.* 2010;15(18). Epub 2010/05/13.  
959 PubMed PMID: 20460093.
- 960 62. Azevedo RS, Silva EV, Carvalho VL, Rodrigues SG, Nunes-Neto JP, Monteiro  
961 H, et al. Mayaro fever virus, Brazilian Amazon. *Emerging infectious diseases.*  
962 2009;15(11):1830-2. Epub 2009/11/07. doi: 10.3201/eid1511.090461. PubMed  
963 PMID: 19891877; PubMed Central PMCID: PMC2857233.
- 964 63. LeDuc JW, Pinheiro FP, Travassos da Rosa AP. An outbreak of Mayaro  
965 virus disease in Belterra, Brazil. II. *Epidemiology. The American journal of*  
966 *tropical medicine and hygiene.* 1981;30(3):682-8. Epub 1981/05/01. PubMed  
967 PMID: 6266264.
- 968 64. Causey OR, Maroja OM. Mayaro virus: a new human disease agent. III.  
969 Investigation of an epidemic of acute febrile illness on the river Guama in Para,  
970 Brazil, and isolation of Mayaro virus as causative agent. *The American journal of*

- 971 tropical medicine and hygiene. 1957;6(6):1017-23. Epub 1957/11/01. PubMed  
972 PMID: 13487974.
- 973 65. da Costa VG, de Rezende Feres VC, Saivish MV, de Lima Gimaque JB,  
974 Moreli ML. Silent emergence of Mayaro and Oropouche viruses in humans in  
975 Central Brazil. International journal of infectious diseases : IJID : official  
976 publication of the International Society for Infectious Diseases. 2017;62:84-5.  
977 Epub 2017/07/26. doi: 10.1016/j.ijid.2017.07.016. PubMed PMID: 28739422.
- 978 66. Brunini S, Franca DDS, Silva JB, Silva LN, Silva FPA, Spadoni M, et al. High  
979 Frequency of Mayaro Virus IgM among Febrile Patients, Central Brazil. Emerging  
980 infectious diseases. 2017;23(6):1025-6. Epub 2017/05/19. doi:  
981 10.3201/eid2306.160929. PubMed PMID: 28518022; PubMed Central PMCID:  
982 PMCPMC5443426.
- 983 67. Pauvolid-Correa A, Juliano RS, Campos Z, Velez J, Nogueira RM, Komar N.  
984 Neutralising antibodies for Mayaro virus in Pantanal, Brazil. Memorias do  
985 Instituto Oswaldo Cruz. 2015;110(1):125-33. Epub 2015/03/06. doi:  
986 10.1590/0074-02760140383. PubMed PMID: 25742272; PubMed Central  
987 PMCID: PMCPMC4371226.
- 988 68. Zuchi N, Heinen LB, Santos MA, Pereira FC, Shlessarenko RD. Molecular  
989 detection of Mayaro virus during a dengue outbreak in the state of Mato Grosso,  
990 Central-West Brazil. Memorias do Instituto Oswaldo Cruz. 2014;109(6):820-3.  
991 Epub 2014/08/21. PubMed PMID: 25141284; PubMed Central PMCID:  
992 PMCPMC4238776.
- 993 69. Grubaugh ND, Faria NR, Andersen KG, Pybus OG. Genomic Insights into  
994 Zika Virus Emergence and Spread. Cell. 2018;172(6):1160-2. Epub 2018/03/10.  
995 doi: 10.1016/j.cell.2018.02.027. PubMed PMID: 29522736.
- 996 70. Lourenco J, Maia de Lima M, Faria NR, Walker A, Kraemer MU, Villabona-  
997 Arenas CJ, et al. Epidemiological and ecological determinants of Zika virus  
998 transmission in an urban setting. eLife. 2017;6. Epub 2017/09/10. doi:  
999 10.7554/eLife.29820. PubMed PMID: 28887877; PubMed Central PMCID:  
1000 PMCPMC5638629.
- 1001 71. Kraemer MU, Sinka ME, Duda KA, Mylne AQ, Shearer FM, Barker CM, et al.  
1002 The global distribution of the arbovirus vectors *Aedes aegypti* and *Ae. albopictus*.

- 1003 eLife. 2015;4:e08347. Epub 2015/07/01. doi: 10.7554/eLife.08347. PubMed  
1004 PMID: 26126267; PubMed Central PMCID: PMC4493616.
- 1005 72. Aragao CF, Cruz ACR, Nunes Neto JP, Monteiro HAO, da Silva EVP, da Silva  
1006 SP, et al. Circulation of Chikungunya virus in *Aedes aegypti* in Maranhao,  
1007 Northeast Brazil. *Acta Trop.* 2018;186:1-4. Epub 2018/06/23. doi:  
1008 10.1016/j.actatropica.2018.06.022. PubMed PMID: 29932932.
- 1009 73. Souza TM, Azeredo EL, Badolato-Correa J, Damasco PV, Santos C,  
1010 Petitinga-Paiva F, et al. First Report of the East-Central South African Genotype of  
1011 Chikungunya Virus in Rio de Janeiro, Brazil. *PLoS currents.* 2017;9. Epub  
1012 2017/03/14. doi:  
1013 10.1371/currents.outbreaks.4200119978d62ccaa454599cd2735727. PubMed  
1014 PMID: 28286701; PubMed Central PMCID: PMC5325710.
- 1015 74. Faria NR, da Costa AC, Lourenco J, Loureiro P, Lopes ME, Ribeiro R, et al.  
1016 Genomic and epidemiological characterisation of a dengue virus outbreak among  
1017 blood donors in Brazil. *Scientific reports.* 2017;7(1):15216. Epub 2017/11/11.  
1018 doi: 10.1038/s41598-017-15152-8. PubMed PMID: 29123142; PubMed Central  
1019 PMCID: PMC5680240.
- 1020 75. Nunes MR, Palacios G, Faria NR, Sousa EC, Jr., Pantoja JA, Rodrigues SG, et  
1021 al. Air travel is associated with intracontinental spread of dengue virus serotypes  
1022 1-3 in Brazil. *PLoS Negl Trop Dis.* 2014;8(4):e2769. doi:  
1023 10.1371/journal.pntd.0002769. PubMed PMID: 24743730; PubMed Central  
1024 PMCID: PMC3990485.
- 1025 76. White SK, Mavian C, Salemi M, Morris JG, Jr., Elbadry MA, Okech BA, et al.  
1026 A new "American" subgroup of African-lineage Chikungunya virus detected in  
1027 and isolated from mosquitoes collected in Haiti, 2016. *PloS one.*  
1028 2018;13(5):e0196857. Epub 2018/05/11. doi: 10.1371/journal.pone.0196857.  
1029 PubMed PMID: 29746539; PubMed Central PMCID: PMC5944945.
- 1030 77. Obolski U, Perez, P. N., Villabobna-Arenas, C. J., Faria, N. R., Lourenco, J.  
1031 MVSE: an R-package that estimates a climate-driven mosquito-borne viral  
1032 suitability index. *bioRxiv.* 2018. doi: <https://doi.org/10.1101/360701>.
- 1033 78. Cherian SS, Walimbe AM, Jadhav SM, Gandhe SS, Hundekar SL, Mishra AC,  
1034 et al. Evolutionary rates and timescale comparison of Chikungunya viruses  
1035 inferred from the whole genome/E1 gene with special reference to the 2005-07

1036 outbreak in the Indian subcontinent. *Infection, genetics and evolution : journal of*  
1037 *molecular epidemiology and evolutionary genetics in infectious diseases.*  
1038 2009;9(1):16-23. Epub 2008/10/23. doi: 10.1016/j.meegid.2008.09.004.  
1039 PubMed PMID: 18940268.  
1040

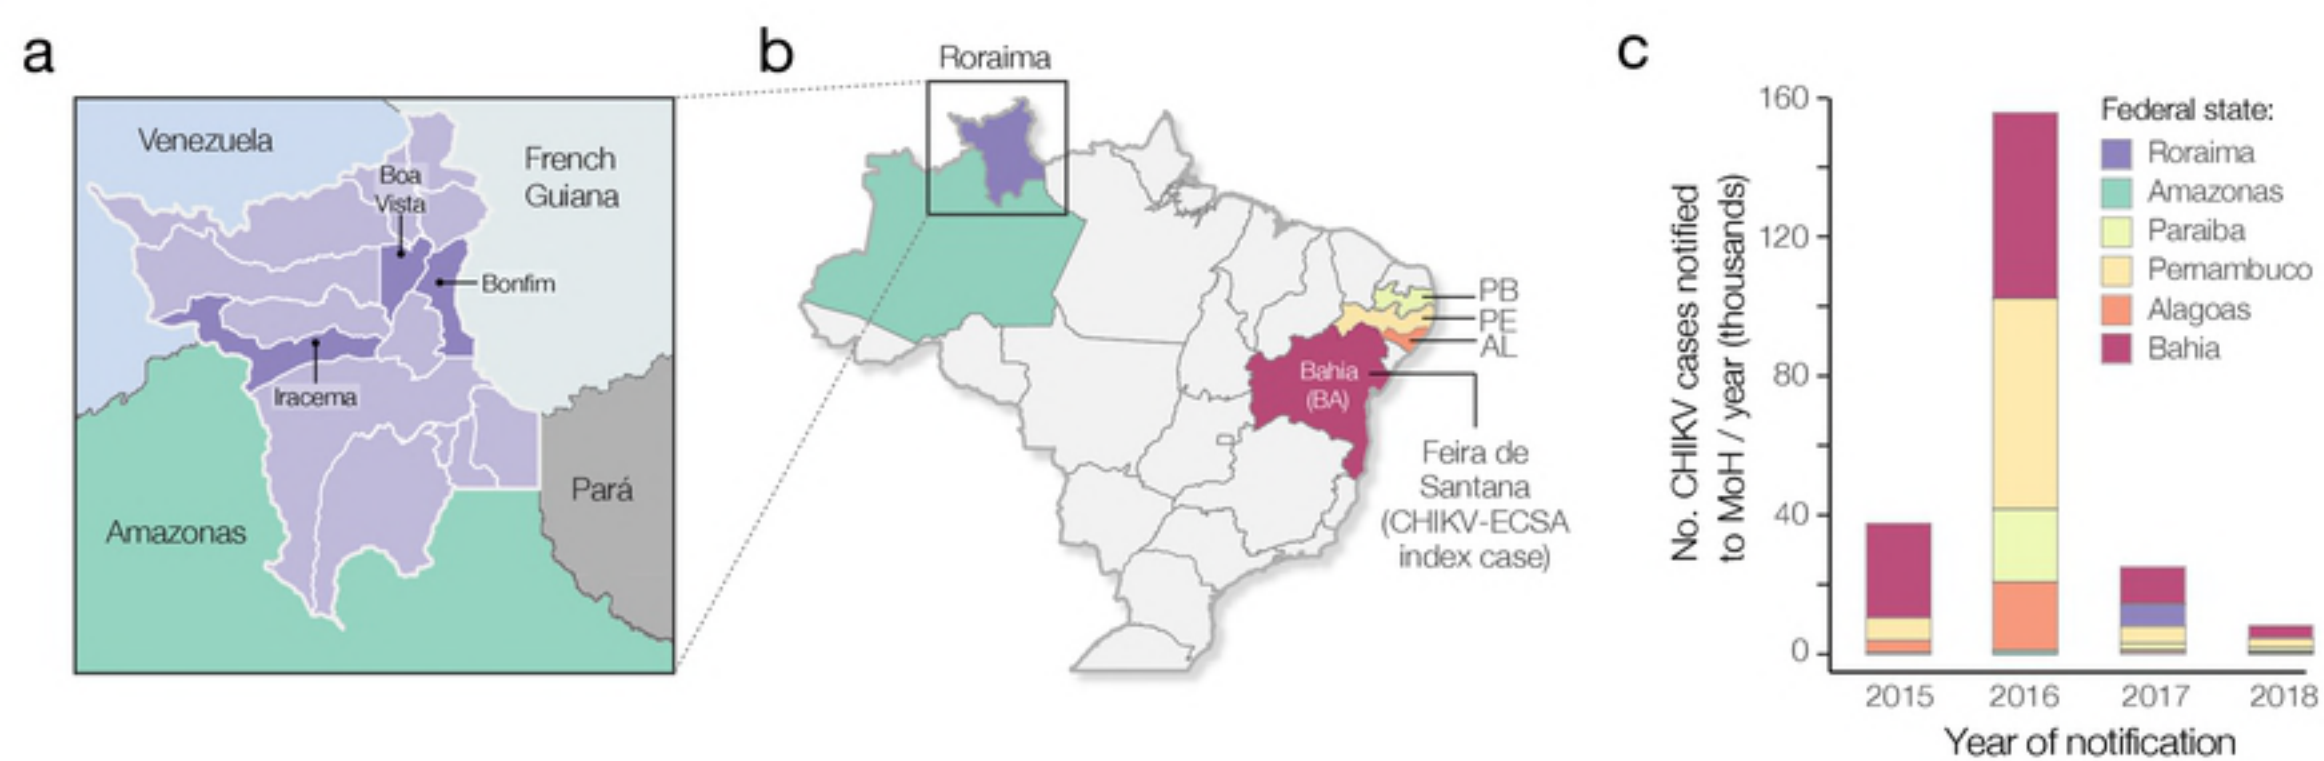

Figure 1

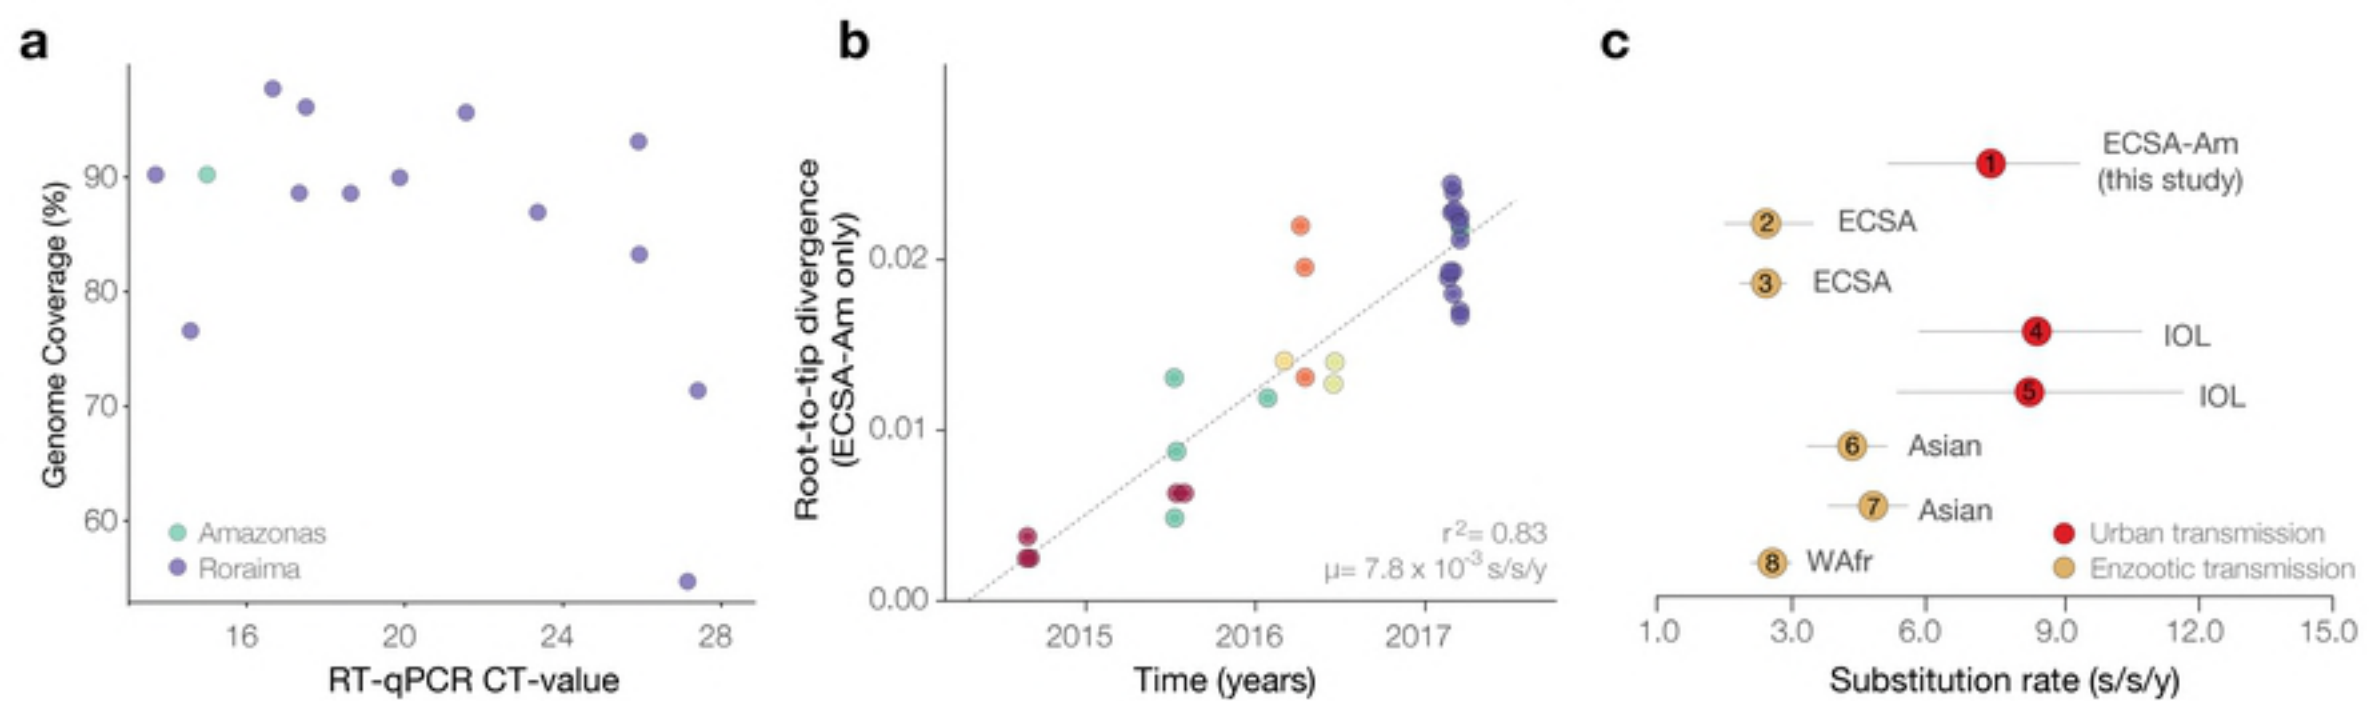

Figure 2



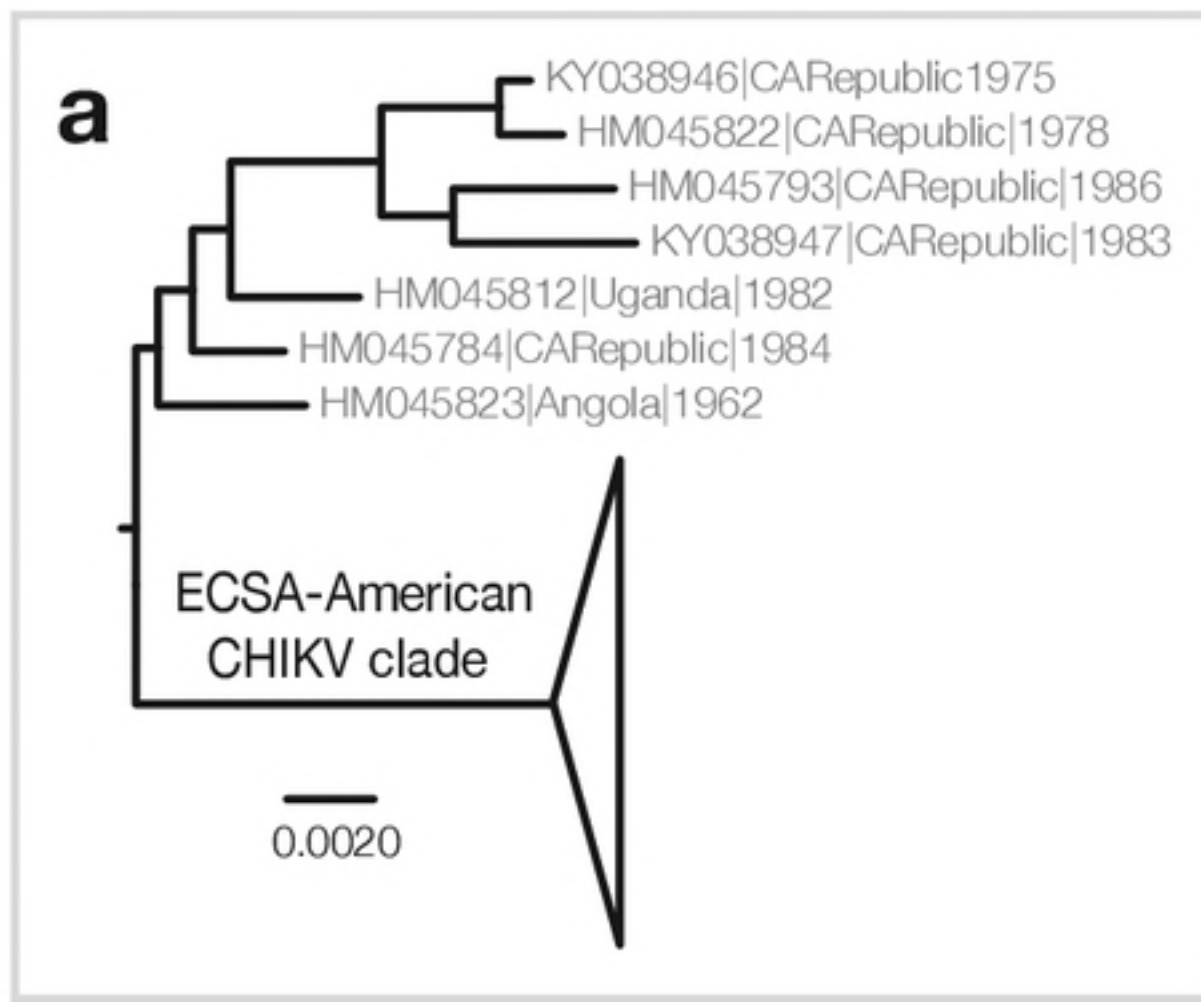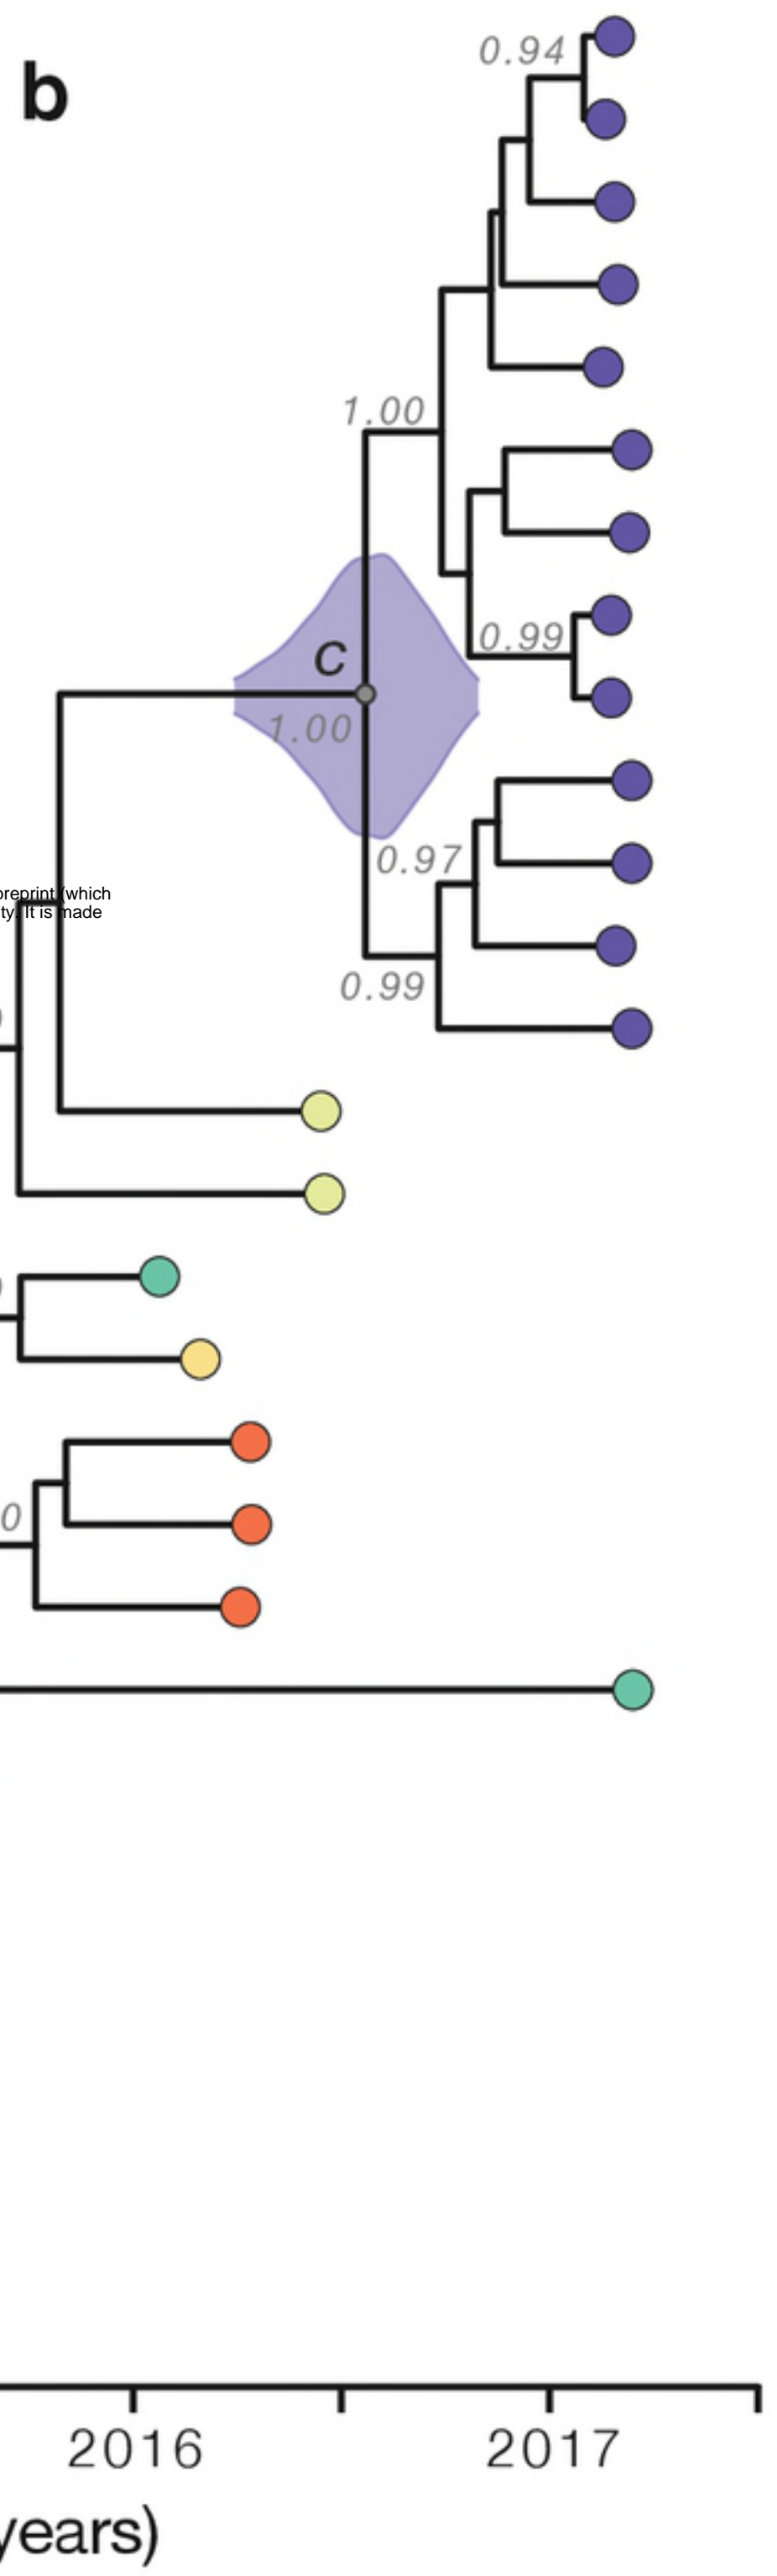

bioRxiv preprint doi: <https://doi.org/10.1101/492595>; this version posted December 10, 2018. The copyright holder for this preprint (which was not certified by peer review) is the author/funder, who has granted bioRxiv a license to display the preprint in perpetuity. It is made available under aCC-BY 4.0 International license.

**Federal state:**

- Roraima
- Amazonas
- Paraiba
- Pernambuco
- Alagoas
- Bahia

Figure 3



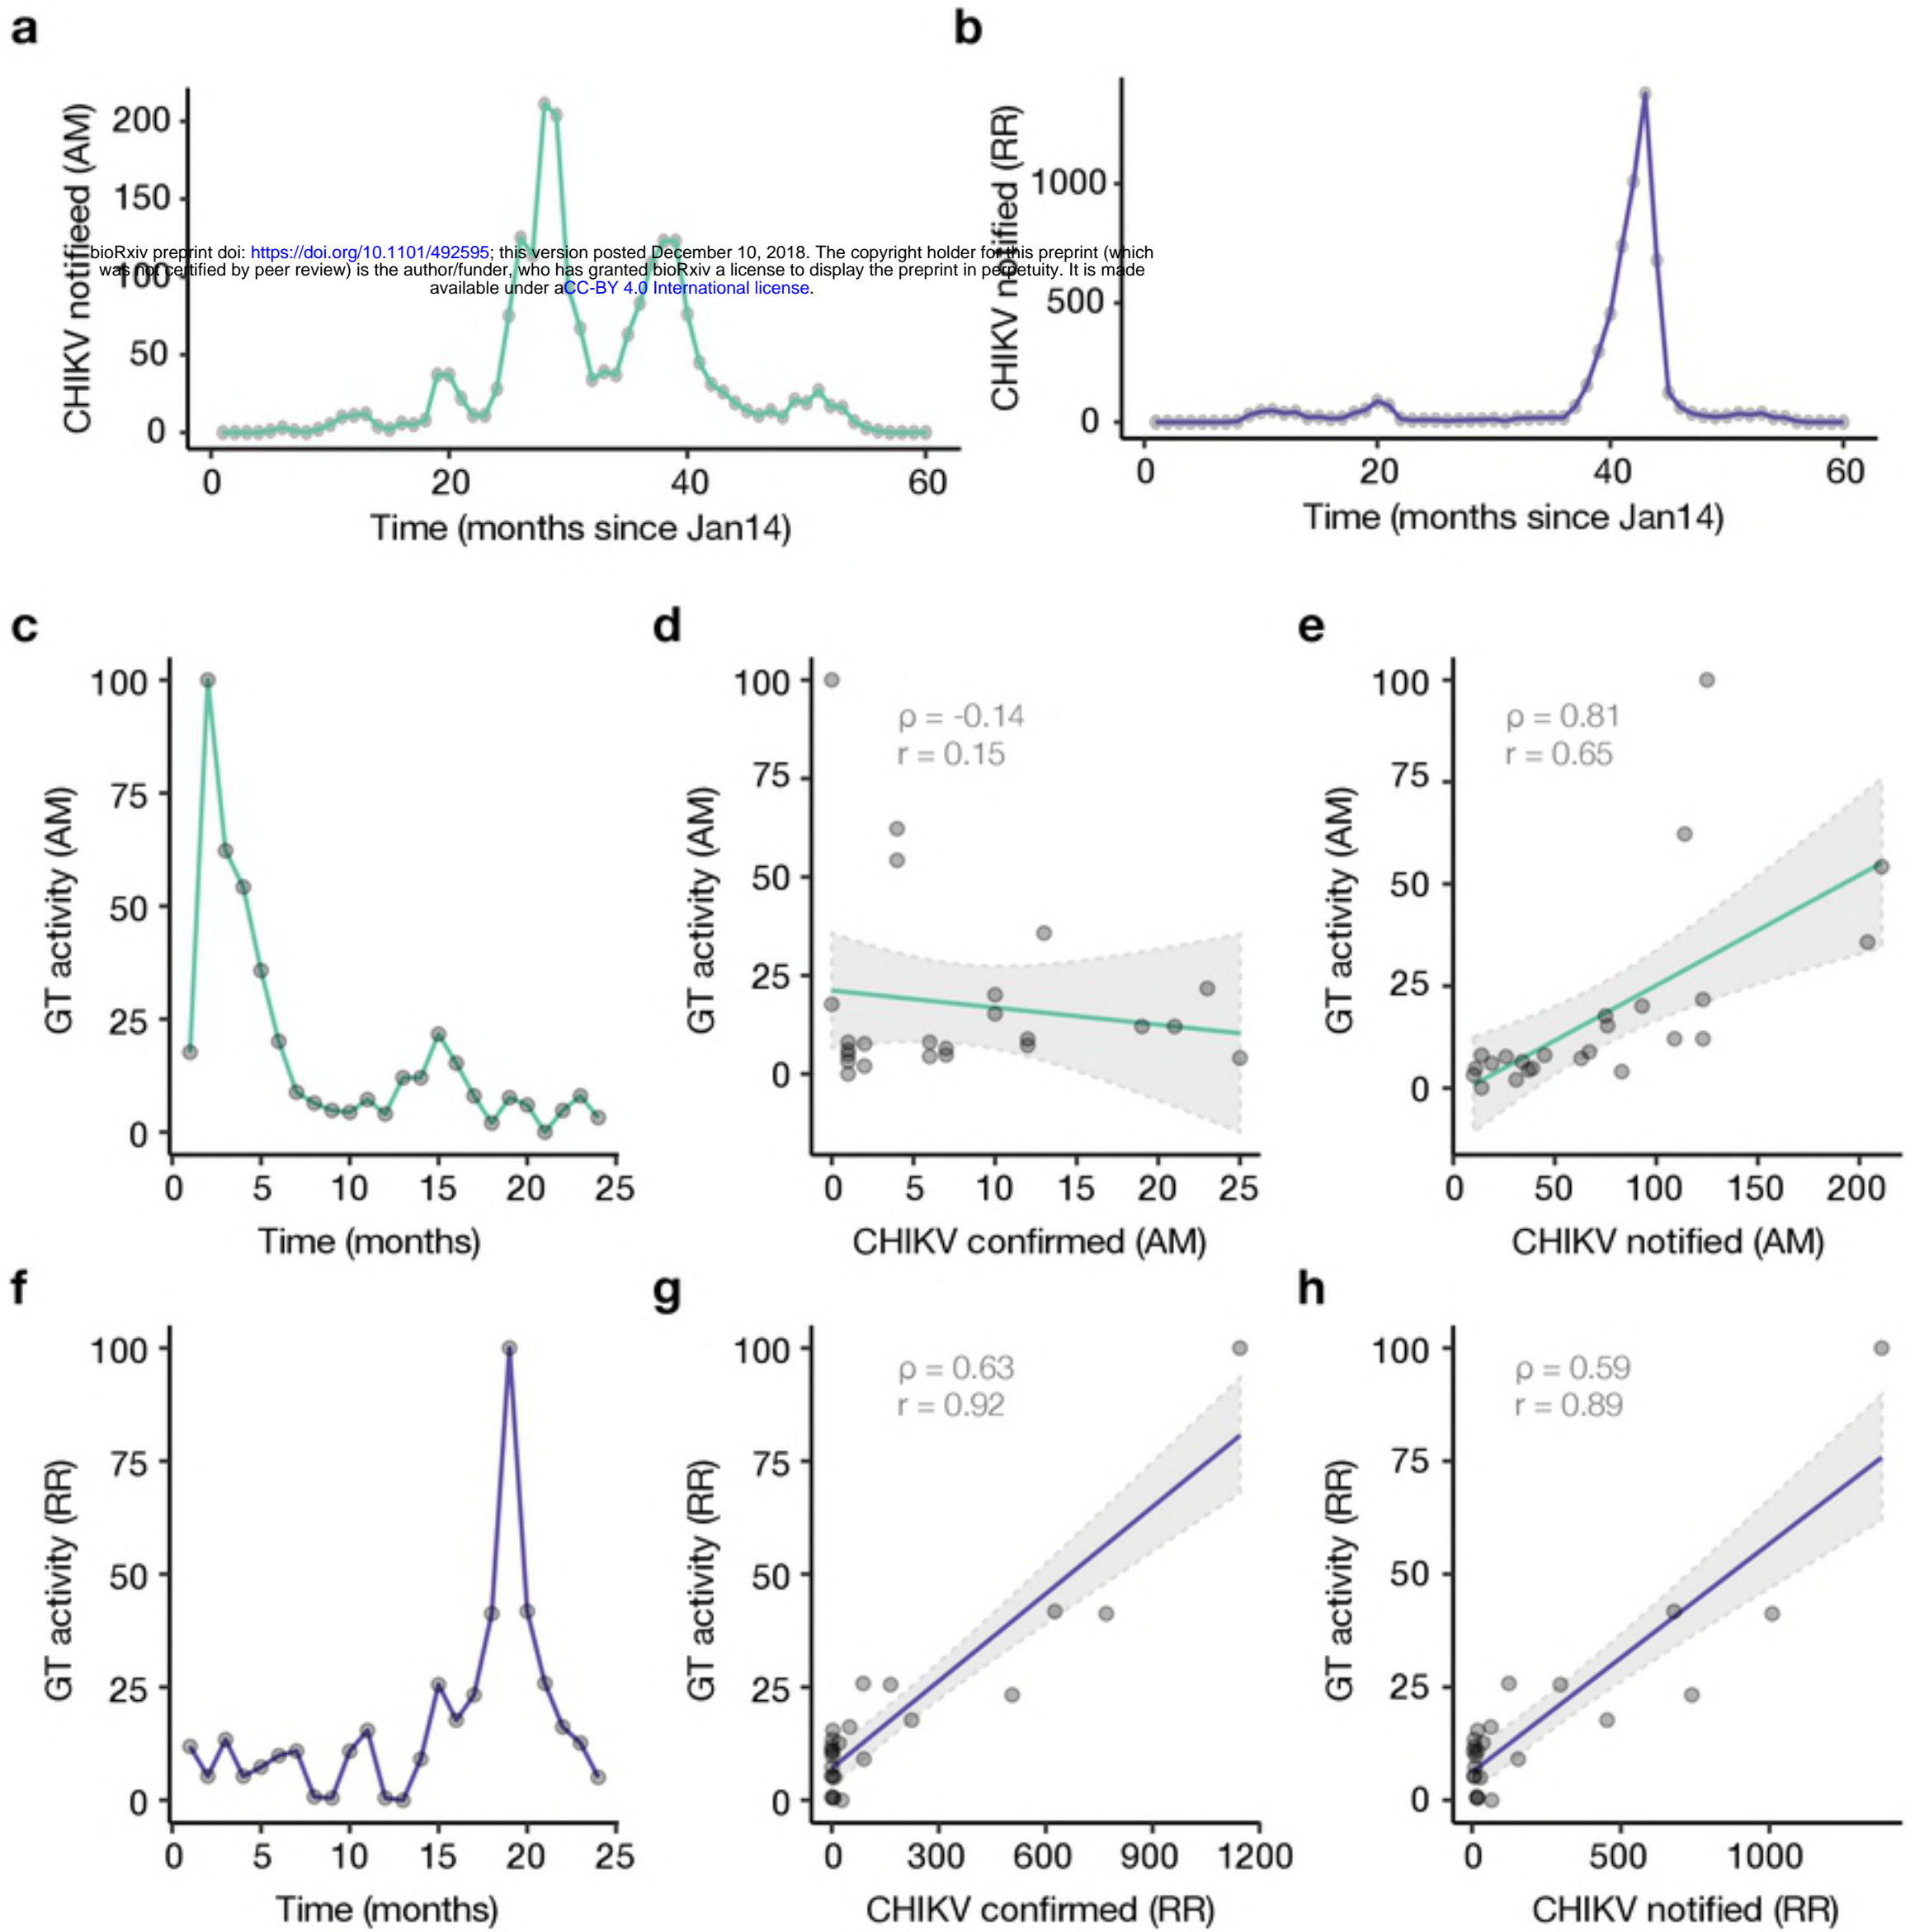

Figure 4
